# Supplementary material for: Ensuring high quality Oyster Care for people experiencing severe and persistent mental illness – A three-phase development of a quality monitoring tool
Source: Research Square preprint supplement (doi:10.21203/rs.3.rs-7545849/v1), 2025-10-14
Supplement: Supplementary file 1 [file 0df9c761d64533f22d74c8cb.docx]

Supplementary material 1. The Oyster Care monitor

Oyster Care - Toward high quality care

Authors: anonymized

In collaboration with the Congregation of the Sisters of Bermhertigheid Jesu and Palliative Care Flanders.

Publication date: 30/09/2024; Version number 3

[www.crustatievezorg.be](http://www.crustatievezorg.be); [info.schelpzorg@gmail.com](mailto:info.schelpzorg@gmail.com)

With thanks to partners from FACT and ART. Their insights and contributions have played an important role in the development of the Oyster Care Monitor

Inhoud

[1. Oyster Care – The Care Model 29](#_Toc180064642)

[Who is Oyster Care for? 29](#_Toc180064643)

[What is Oyster Care? 29](#_Toc180064644)

[2. Oyster Care – The use of quality indicators 31](#_Toc180064645)

[What are quality indicators? 31](#_Toc180064646)

[The development of a set of quality indicators 32](#_Toc180064647)

[Phase 1 - Qualitative research 32](#_Toc180064648)

[Phase 2 - Delphi method 32](#_Toc180064649)

[Phase 3 - Selecting indicators 33](#_Toc180064650)

[3. The set of quality indicators for Oyster Care 34](#_Toc180064651)

[Introduction 34](#_Toc180064652)

[Domain 1. The care process 36](#_Toc180064653)

[Domain 2. The somatic pillar 43](#_Toc180064654)

[Domain 3. The psychological pillar 48](#_Toc180064655)

[Domain 4. The social pillar 53](#_Toc180064656)

[Domain 5. The existential pillar 58](#_Toc180064657)

[Domain 6. End-of-Life care 61](#_Toc180064658)

[Domain 7. Teamvision, -culture and -development 64](#_Toc180064659)

[Domain 8. The place of residence 69](#_Toc180064660)

[4. Recommendations for further research and policy 72](#_Toc180064661)

[References 74](#_Toc180064662)

[Acknowledgements 76](#_Toc180064663)

# Oyster Care – The Care Model

## Who is Oyster Care for?

Oyster Care or shell care as a model of care was developed for people with severe and persistent psychiatric illness (SPMI). Although the term “SPMI” or “severe persistent mental illness (SPMI)” is frequently used internationally, there is no single definition for it. Rather, SPMI refers to a patient population rather than a disease status. Most definitions of SPMI include a combination of three dimensions: diagnosis, duration and impairment. Diagnosis refers to a variety of diseases. Duration refers to the duration of symptoms, treatment or disability. Restriction refers to possible functional or social limitations24.

People with severe and persistent psychiatric disorders often have difficulty integrating into society and may require long-term and intensive treatment. Although there are a variety of psychiatric conditions within the SPMI target population, including depression, schizophrenia, bipolar disorder, anxiety disorder, autism spectrum disorder and chronic addiction, what these people have in common is that their symptoms persist despite going through numerous *evidence-based* treatments. Often these people have not one, but two or three diagnoses, and because of the complexity of their problems, these people often exhibit disruptive, deviant or (self-)destructive behavior. Their situation often leads to a significantly lower life expectancy, limitations in daily functioning and low quality of life2,5,22,24. In many cases, usual therapeutic approaches aimed at “curing” SPMI are ineffective, which sometimes makes health care providers reluctant to offer further treatment. This group of people, often considered chronic and therapy-resistant, needs alternative approaches that focus less on treating the condition and more on improving the person's quality of life12,15. There is growing evidence that a “palliative care approach” may be an appropriate response to the needs of this target population8,15,20,22. Based on a palliative philosophy, the innovative care model 'Oyster Care' has been developed.

## What is Oyster Care?

Oyster Care was developed as a response to the care needs of people with severe and persistent psychiatric disorders who appear to be “out of treatment,” who are suffering severely psychologically, for whom socialization is difficult to achieve, who have a persistent need for support, and who are in danger of being forgotten by both the government and the mental health system. The focus is no longer on cure or recovery, but rather on:

- Making suffering more bearable
- Helping bear the burden of life
- Enhancing the quality of life
- Building a meaningful existence, seeking connection
- Preserving or restoring human dignity
- Limiting the damage
- Supporting the grieving process

Oyster Care is a holistic approach that relies on the integration of four pillars. The physical pillar addresses somatic limitations; the psychological pillar focuses on promoting comfort and well-being; the social pillar provides structure, activities and contacts within a safe living environment; and the existential pillar addresses existential and meaning questions and promotes the experience of a meaningful life. Other important emphases within the care model are: a person-centered approach, flexible handling of rules and a good dose of creativity3,4.

Oyster Care is derived from the Latin word “crusta,” meaning shell. As Dr. Ilse Decorte describes, “We protect these people with a solid shell in which they feel secure. At the same time, the term refers to the department in the care facility and the departmental operation, which, like an external skeleton, gives meaning, grip and structure to these people who do not have sufficient strength for that themselves.” Or Dr. Françoise Verfaillie: “Oyster Care is a dynamic approach that responds to the needs, possibilities and pace of each individual: within the security, people can fold back or take new steps (woodshedding); the shell can be more or less open.” In English, the term Oyster Care is translated as “*Oyster* *Care*' or ”Oyster Care. This is because the original inhabitant of the shell is the oyster, which is fragile, and the shell protects the oyster. The pearl is created in response to a foreign object entering the shell and causing an injury; the oyster adapts to the threat by hardening the foreign object. Thus, the pearl is the result of a coping mechanism of the oyster; it is learning to deal with vulnerability. The description below clearly depicts the metaphor of the shell:

Caregivers form an exoskeleton or shell, so to speak, around the person with SPMI and help them function in everyday life. To function, these people rely primarily on the “external structure” provided to them rather than the “internal structure” of their own abilities and often failing coping mechanisms. When the person's care needs become greater or when the person may harm themselves or others, the shell closes more to protect the person. When the person's care needs decrease and the behavior becomes less harmful, the shell will open more so that the person can resume more autonomy. For these reasons, Oyster Care is also called shell care or in English *Oyster Care* (Decorte et al., 2020 - p.136).

Within Oyster Care, there is a conscious move away from persistent and unchanging treatments that prevent repetition of what does not help or sometimes even causes harm. Instead, patient treatment and care take center stage. This means taking time and respecting the person's pace and perspective. There is no pressure to change, but space is created for change in small steps, when the person is open to it and ready.

# Oyster Care – The use of quality indicators

Oyster Care is a relatively new approach to care for people with SPMI; it has grown out of the practical experience of caregivers, and initial reactions from caregivers and care users have been positive. Caregivers and care users experience an increased sense of well-being, and reduced suffering and improved quality of life are noted among care users. Consequently, as implementation of the Oyster Care Model progresses within various mental health facilities, there is a need for a systematic and *evidence-based* tool that can translate the philosophy of the model into practice to effectively guide caregivers in its principles and to evaluate the quality of their care provided. This issue describes the development of such an instrument. The instrument is a monitor consisting of quality indicators that can be used in Flemish mental health facilities to test whether the care model is being properly applied in practice and thus the desired outcomes are being achieved.

In the first instance, the monitor describes the conceptual model of Oyster Care: what are the desired program components that describe the intended quality of care?

Second, the monitor can promote better adherence to the model of care (model fidelity) and thus ensure better quality of care. This is because the Oyster Care Teams are sensitized around the various program elements and proper evaluation of outcomes becomes possible. By enabling teams to evaluate and test their current operation against an ideal-typical model, they gain an indication of what is already going well and where there is room for improvement.

## What are quality indicators?

Quality indicators refer to measurable aspects of care and, through scores, provide insight into the quality of those aspects within the care provided. However, they are not an absolute measure, but serve as a barometer of which aspects of care are going well and which can be improved.

How are quality indicators used to improve care? Quality scores allow teams to evaluate the quality of care they provide. On this basis, they can work together to determine which aspects of care are going well and which aspects could be improved. For example, by measuring quality annually, using quality indicators, and setting improvement goals within the team, they can track progress in the quality of care and assess the effectiveness of their improvement efforts.

Why be interested in quality of Oyster Care? Oyster Care teams, care facilities, managers and policy makers value the quality of care they provide. Quality indicators enable Oyster Care teams to measure and improve the quality of care in various aspects over the long term. This not only benefits care users and their families, but also provides valuable insights for policy making and accreditation processes within hospital settings.

Who is this monitor intended for? This set of quality indicators can be used by Oyster Care Units (psychiatric hospitals and psychiatric care homes) in Flanders to evaluate and possibly improve quality of care. In the future, the quality indicators will be translated to other care contexts, such as residential care centers and mobile teams.

## The development of a set of quality indicators

The development of the monitor consisted of three phases, with each phase having specific objectives and research questions. The FACT scale21 and the ART scale23 were important influences in forming the Oyster Care monitor. If you would like to learn more about the development of the monitor, please contact one of the authors.

### Phase 1 - Qualitative research

Eight facilities specializing in mental health (GGZ) services participated in the qualitative study (January 2022 - November 2022). The first facility was a partnership between several mental health organizations in Flemish Brabant. Four of the facilities were psychiatric hospitals, one in Flemish Brabant, one in West Flanders and two in Antwerp. Three other facilities were psychiatric nursing homes, one in Antwerp and two in East Flanders. These facilities had experience in providing care to people with SPMI; and expressed interest in the Oyster Care Model, some of whom had already (partially) implemented the model in their practice. Phase 1a and phase 1b proceeded simultaneously. The data were transcribed and analyzed according to a thematic analysis1.

In phase 1a, distinctive aspects of Oyster Care were examined from the perspective of health care providers, managers and policy staff. 44 individuals were surveyed through focus groups and individual interviews. The research questions were:

- How is Oyster Care shaped within the facility?
- What are important aspects of the model of care?
- What does Oyster Care ideally look like and what program components are needed to achieve this?

Phase 1b explored the needs of people with SPMI and caregivers, and their experiences with Oyster Care. Sixteen people with SPMI and eight family members or other next-of-kin were surveyed through individual interviews. The research questions were:

- What needs do people with SPMI and their loved ones have, and how can these needs be met by Oyster Care?
- How is Oyster Care experienced by people with SPMI and their loved ones and how do they experience it similar/different from other models of care?
- How do people with SPMI and their loved ones experience staying in a Oyster Care Unit and what could make their stay better?

### Phase 2 - Delphi method

The second phase of the study (October 2022 - March 2023) focused on validating quality indicators that could support model fidelity and quality of Oyster Care in Flemish mental health facilities. The research questions were:

- How can the conceptual model 'Oyster Care' be operationalized (describe program elements)?
- What process and outcome measures are there to assess the quality (effect) of Oyster Care?
- To what extent are the indicators of the Oyster Care Quality Monitor clear and relevant according to end-users in Flemish mental health facilities working with this model of care?

Based on insights from the literature and qualitative research, a first set of quality indicators was developed. This set was substantively validated through a Delphi method to develop a clear and relevant set of quality indicators. Three Delphi rounds took place in which fifteen experts with clinical and/or academic backgrounds participated. Most of these experts worked in psychiatric hospitals or psychiatric nursing homes, the same facilities that participated in the first phase of the study. In addition, experts were involved from other organizations not directly involved in the initial research phase.

### Phase 3 - Selecting indicators

During the third phase of the research, the number of indicators was reduced to make the monitor not only usable, but also practical for teams wishing to evaluate their practices. The third research phase was driven by the research question: what makes Oyster Care so unique and which indicators are important for this? To accomplish this, experts within each domain of the monitor were consulted on selecting those indicators that they felt were most important to measure the quality of Oyster Care. The indicators that were not selected for the actual monitor were included as good practices in the workbook.

# The set of quality indicators for Oyster Care

The following terminology is used in this volume:

- The term “guidance” is consistently used to encompass both treatment, counseling and care for individuals with SPMI. This choice stems from the fact that in a hospital setting treatment is usually referred to, whereas within a PVT context guidance and care are more likely to be referred to.
- The term “significant other” is used to refer to the care user's informal social network, which includes family members, friends, former colleagues, neighbors and other relevant relationships. In this publication, the term is synonymous with “loved ones” or “next of kin.
- The term “care user” is consistently used to refer to a person experiencing SPMI and using Oyster Care. In contrast, the term “patient” is often used in a hospital setting, while “resident” is referred to in a PVT setting.
- The term “care partner” is used to refer to a person who plays an active role in the delivery of care to a care user, involving both professionally trained and non-professionally trained care partners.
- In this issue, only the pronoun 'his' is used. This choice is based on pragmatic reasons and is in no way intended to detract from the gender inclusive that Oyster Care stands for.

## Introduction

Through the Monitor Oyster Care, Flemish mental health facilities can test whether the care model is properly applied in practice and the desired outcomes are achieved. The monitor can be used by Oyster Care Units of **psychiatric hospitals and psychiatric care homes in Flanders** to evaluate and possibly improve quality of care. By using the quality indicators, teams have the opportunity to gain insight into their own practice as objectively as possible. On the one hand through self-evaluation, it also offers teams the opportunity to make reciprocal visits to evaluate each other's practices. This process promotes cooperation and provides an opportunity to learn from each other's experiences in caring for people with SPMI. The monitor consists of 24 themes divided into eight domains. The eight domains are: 1. The care process, 2. The somatic pillar, 3. The psychological pillar, 4. The social pillar, 5. The existential pillar, 6. End-of-life care, 7. Team vision, culture and development and 8. The residence. Teams have the flexibility to periodically evaluate their performance in all eight domains simultaneously or to do so gradually by focusing on specific domains.

Each domain starts with a **model description** based on insights from the literature relevant to that domain. It serves as a theoretical framework used to understand and analyze the complexity of that domain; to identify the issues and challenges faced by people with SPMI within that specific domain; and provides direction for developing quality indicators. This is followed by a **workbook** piece for each theme in that domain on how to understand the content of that theme in order to test the theme appropriately. Good practices collected during the two-year study are also shared. Each theme describes a set of indicators that serve as a qualitative interpretation of that theme. They will largely determine the score of that theme, but do not serve merely as a strict test. This method serves to promote appreciative evaluation, where own innovations, creativity and space for the team to search for what does and does not work within the counseling and care of people with SPMI can be central; and to avoid reducing the operational functioning of a department to simply ticking off criteria that have or have not been met.

The team can then rate the extent to which a theme has been implemented in their own practice on a **scale** ranging from 'not visible' in implementation to 'in development', 'embedded' and 'pearl'. An explanation for the assignment of implementation level can be provided in the comments section. Scores are determined based on observed behavior and actual activities, and thus are not based on pre-planned or intended behavior. Various methods can be used to assess themes, including conducting interviews with team members, care users and their family members, studying records and analyzing team meetings. Upon completion of a review, the team gains insight into thematic areas where improvements can be made and in which themes they can be considered exemplary and innovative. Based on these insights, a team can identify some themes that are most important for them to make changes.

Understanding current functioning not only helps improve internal practices, it can also stimulate interaction and knowledge exchange between different Oyster Care departments. Within this dialogue, own innovations and good practices can be shared, which can be inspiring and improve the quality of care for people with SPMI. In the long term, the degree of implementation can be expressed in numerical scores, making the comparison between different departments clearer and reflecting objectively measurable progress in one's own practice. For example, in subsequent versions of the monitor.

| Theme X. | | | | |
| --- | --- | --- | --- | --- |
| Not visible | In development | Embedded | Pearl | Comments |
| - *Quality indicator 1* - *Quality indicator 2* - *Quality indicator 3* | | | | |

Figure 1. *Measurement tool to assess the degree of implementation of a specific theme*

## Domain 1. The care process

*The care process is the structured sequence of activities that the team follows to maintain, improve or restore the health, well-being and quality of life of a care user.* *It includes the assessment, planning, implementation and evaluation of care.* *The care process is divided into four themes, namely the introduction, the personal care plan, the supervision consultation and the scaling up and down of care intensification*

**Model description**

People with SPMI are at high risk of receiving care that is inconsistent with their own life goals; and guidance goals are often formulated from the perspective of the caregiver19,22. Instead, within Oyster Care, the focus is on matching the care process to the individual and complex care needs of the person in question, and a holistic approach is used to achieve this3. Counseling is based on the idea that something more can always be done to alleviate suffering8; and unlike previous treatments, counseling goals are focused on promoting quality of life and stabilization of symptoms4,18. Thus, the team works on-task with the individual care user, exploring what the person needs to experience a quality of life that is desirable for them, taking into account limits due to the condition. A shift in counseling goals reflects the reality that while some conditions cannot be cured, alleviating suffering and optimizing daily functioning become all the more important. The counseling plan rests on four pillars of care: physical, emotional, social and spiritual well-being. These pillars reflect recognition of the complex and interconnected nature of human suffering and well-being, and from the integration of these four pillars, specific treatment and counseling goals are formulated. An orientation phase in which introductions are made to the care user can help provide a clear picture of their specific care preferences and desires. At the same time, care users' complex care needs in different areas of life (physical, psychological, social and existential) can be explored and assessed without immediately associating these care needs with a specific psychiatric pathology. Family and other significant others can also contribute to this process of identification and assessment by involving them, in consultation with the care user, early in the care process and actively questioning their specific preferences of care4,15,18,23. There is also a strong commitment to coordination and continuity of care to appropriately meet care users' needs. Indeed, poor coordination and integration of health care would mean that people with SPMI are again at risk of “falling through the cracks” and not receiving optimal care2. Thus, during counseling consultations, the team, the care user and, if desired, significant others engage in discussions about which counseling goals should be prioritized to improve quality of life12,18. Discussions about treatment, support and interventions in accordance with the care user's personal goals take place regularly to ensure that treatment and support plans are in line with changing circumstances and needs23. Sufficient time and space is set aside between consultations to discover what resonates and is effective within treatment and support. Central to the care process are respect for the care user's autonomy, informed consent and shared decision-making regarding treatment and care. This promotes not only ethical care delivery, but also care user satisfaction and well-being. Yet these processes are complex, especially when the person faces limitations in language skills or decision-making abilities, in that SPMI can affect the ability to make actively informed choices8,11,15,18. Within Oyster Care, it is necessary to have dynamic up and down mechanisms for intensive care delivery, with the goal of providing personalized care at an individual level when necessary. Being able to adapt the intensity of care to the changing needs of the care user depends on good coordination and collaboration between the team, management and other care departments. For example, sharing *resources* with other care departments within the hospital, temporary hiring of team members or working with fewer care users for a period of time. Ideally, the person in charge can temporarily keep the utilization rate of a shell care unit lower or temporarily increase its staffing level by appealing to solidarity within the care units and the care organization3,4.

1. **The acquaintance**

**Workbook:** The first three months of the stay are devoted to creating a safe environment for the care user in which he feels comfortable and secure. During this introductory period, the team, the care user and significant others have the opportunity to get to know each other's background, expectations and wishes about care; and a foundation of trust and communication is built. Care users and their loved ones are informed about the vision, methods and team members involved in care so they have a better idea of what to expect and how the care process will proceed. While providing this information is essential, it must be tailored to the care user's individual needs, questions and pace. Moreover, building a foundation for communication and trust can sometimes take priority over immediately explaining the treatment vision. Indeed, building a relationship of trust requires attention and time, and this process cannot be rushed.

The team identifies who is part of the care user's (in)formal network. This includes family members, friends, previous practitioners and other important people in the care user's life. In consultation with the care user, the team invites these individuals to share knowledge and experiences about what constitutes good care for the care user. Such introductions can lead to a fuller picture of the care user and their treatment history, which can help develop accurate hypotheses about symptoms and the best care approach. Next, the team agrees with the network, professional and nonprofessional care partners, how they want to be involved in the care process, such as sharing responsibilities, frequency of consultation, and so on; and fulfills these structural collaborative agreements. Finally, it can be supportive at this stage to be able to quickly contact previous care departments, for example, to discuss how they interpret certain symptoms of the care user.

Even at the introductory phase, the team approaches the care user in a holistic manner to provide tailored care. The team examines the various care needs and goals in different areas of life, including somatic, psychological, social and existential. This includes examining cultural preferences, life history, wants and desires for current counseling. However, these initial insights are only a beginning of understanding the care user's needs. Some life areas may be more prominent in the initial phase of the care process and later shift to the background due to changes in counseling, for example. This highlights the flexibility of the care process with the team constantly adapting to the changing needs of the care user.

| **Theme 1. The acquaintance** | | | | |
| --- | --- | --- | --- | --- |
| Not visible | In development | Embedded | Pearl | Comments |
| - The team is committed to creating a safe environment for the care user; establishing a basis for trust and communication; and provides information about the vision, methods and members of the team at the pace appropriate to the individual needs of the care user - The team identifies who the care user's (in)formal network is; invites these individuals to learn from each other's knowledge and experiences of good care; and regularly agrees with them how they want to be involved in the care process - The team explores with the care user what their care needs (somatic, psychological, social and existential), wishes and desires are; and reflects on previous counseling and how current counseling should look different | | | | |

1. **The personalized support plan**

**Workbook:** The team is committed to establishing a therapeutic process that improves the care user's well-being and quality of life by providing a holistic approach to treatment, counseling and care planning. To this end, the care user, loved ones and caregivers work together in developing a counseling plan that does justice to the care user's own unique needs and values.

The support plan describes the care user's current (care) needs, desires, wishes and preferences and unites somatic, psychological, social and existential dimensions of care. The support plan thus witnesses total care resting on four pillars (somatic, psychological, social and existential). Specific counseling goals are derived from this integrated, holistic approach. A crucial aspect here is to set realistic expectations while leaving room for hope. Preferably, the care user, loved ones and caregivers agree on which counseling goals are prioritized to maximize quality of life, and are perceived by each as valuable and achievable. However, this is not always obvious. Sometimes caregivers may make assumptions about wants and desires, especially if the caregiver has difficulty communicating these desires clearly. Or situations where certain goals are necessary but not perceived as so important by the care user. For example, to support care needs in the physical, psychological, social and existential areas, and especially when there are serious risks to the health of the care user himself or others. Therefore, the process of formulating (care) needs, desires, wishes, preferences and consequently counseling goals takes place carefully, thoughtfully and in consultation. Consideration of the life story can serve as a valuable guide in this context.

Thus, the team, together with the care user, and if desired significant others, establishes counseling goals based on the care user's current care needs, values, desires, and preferences. This process of shared decision-making not only contributes to personalized care, but also strengthens the care user's autonomy and sense of control over their own health. At the same time, it is central within the care process that the team encourages the care user to make their own choices; and puts maximum effort into informed consent and shared decision-making about care, treatment and support. This cannot be taken for granted, for example, when care users are limited in their language skills or when their ability to understand and process complex information is limited. Here it is important for the team to communicate with the care user in a simple, clear and understandable way. Sometimes there is a discrepancy between what a care user expresses in words and what they are actually trying to communicate. In this process of interpretation, the team plays an important role; in an empathetic and patient way, they try to identify and understand the deeper meaning behind the care user's verbal and nonverbal cues, to ensure that care users' choices and wishes for guidance are respected. Involving significant others, depending on the context of their relationship with the care user, can contribute to understanding and consequently respecting the care user's wishes.

The support plan describes how to work toward the support goals, and what support the care user needs in doing so. First, it should be determined what responsibilities the care user will take on himself. Then it can be determined what forms of guidance can be supportive and which caregivers will be involved. When necessary, additional professional care partners may be involved based on their specific expertise to work toward the counseling goals. The counseling plan notes the roles and responsibilities of all care partners in relation to the counseling goals, possibly including who takes the lead in the care process.

| **Theme 2. The personalized support plan** | | | | |
| --- | --- | --- | --- | --- |
| Not visible | In development | Embedded | Pearl | Comments |
| - The support plan describes the care user's current (care) needs, desires, wishes and preferences - Support goals are formulated through collaboration between the care user, the team and significant others, and are aligned with each other's perspectives - The support plan formulates how to work towards the support goals; what support the care user needs for this; and defines the tasks and responsibilities of the care user, the team and significant others with regard to the support goals | | | | |

1. **The support meeting**

**Workbook:** The support meeting provides a structured opportunity to discuss reasoned counseling goals from different perspectives, evaluate progress and make adjustments. During the consultation, the care user's (care) needs, values, desires and life story are brought to the forefront to ensure an individualized approach. There is a focus during the consultation not only on challenges and problems, but also on positive events and successes. By reflecting on what has contributed to positive experiences, the team can better understand which approaches and interventions have been effective. Counseling evaluation contributes to continuous improvement of the care experience; and creating a supportive environment for the care user where promoting quality of life is central.

Individuals from different disciplines participate in the support meeting so that the care needs of the care user can be considered from multiple perspectives to formulate a collaborative, holistic approach. For some care users, attending a counseling consultation may be challenging due to the nature of their condition, anxiety or other personal reasons. It is then important to find alternative ways for the care user's voice to be heard in the consultation; it is also advisable to always have the personal attendant present at the consultation to represent the care user. After all, decision-making around care is driven by care users' needs and desires, even if they are not physically present. Alternatively, the care user can decide who attends the counseling consultation. This choice allows the care user to feel more involved and comfortable at the support meeting. Care users can also choose to have significant others join the support meeting. Significant others often bring unique insights because they are well-versed in the care user's history, needs and preferences, and this can provide valuable context that caregivers may not have. However, it is also important to understand that loved ones may have certain expectations regarding care that may not fully align with the views of the team and the care user themselves. This can lead to tensions if these expectations are not addressed and aligned. The supervision consultation provides an opportunity to openly discuss these expectations and negotiate the best possible care for the care user.

An initial support meeting takes place after three months. Insights from the introduction form the basis for this initial consultation. Nevertheless, some care users may need more time to indicate what they want within their guidance. Therefore, the first support meeting is not seen as a strict deadline for obtaining all relevant information. Instead, it should serve as a first step in an ongoing dialogue between caregiver and care user. After the initial meeting, support meetings are organized on a regular basis. In a psychiatric hospital these take place at least twice a year, in a psychiatric nursing home at least once a year. However, the frequency may increase depending on the complexity and changing needs of the care user.

In addition to the annual or semi-annual meetings, evaluation moments are built in between these consultations. These interim reviews provide a more flexible approach and allow caregivers to respond quickly to changing care needs of the care user. This allows what is not working to be let go and new ways to support the care user can be explored. The team feels free to explore new methods of treatment and counseling without concern about whether these approaches can be implemented in a less intensive setting. After all, support can work now, and gradual reduction of care intensity is part of the care process. Guidance and support is adjusted through trial-and-error methods, therefore these evaluation moments play an important role in monitoring progress and making timely adjustments to guidance. New appointments, and the rationale for them, are noted in the personalized support plan and fed back to the care user and care partners involved to ensure cooperation, continuity and effectiveness of care.

| **Theme 3. The support meeting** | | | | |
| --- | --- | --- | --- | --- |
| Not visible | In development | Embedded | Pearl | Comments |
| - Joining the counseling consultation are the personal attendant, attending physician and psychologist. To the care user and/or significant others not present, the team explores their views in an alternative way to represent them during the consultation - A thorough review of the supervision plan takes place regularly. A first counseling meeting takes place after three months based on insights from the introductory phase, thereafter it takes place at least once a year (PVT) or twice a year (PZ). Interim evaluation moments are scheduled to evaluate the guidance in the short term as well. - New appointments, and the rationale for them, are noted in the personal supervision plan and thus fed back to the care user, significant others and other care partners | | | | |

1. **Upscaling and downscaling care intensity.**

**Workbook:** The team applies both a structured approach and a flexible attitude to respond appropriately to situations where intensification of care is needed. For example, pre-defining strategies for care intensification is a valuable practice. This enables the team to act quickly and in a coordinated manner when a crisis occurs. In addition, there is a need for pragmatism and adaptability on the part of the team, which does not blindly rely on protocols for care intensification because they are not always appropriate for a care user's specific needs. Responding effectively to situations where there is a need for care intensification thus requires a balance between structured preparation and flexible implementation, harmonizing the holistic needs of the care user and the organizational context.

The team can smoothly scale up and down care intensity in its own department and according to the individual needs of care users. Here it is important that the team recognizes early signs of crisis in the care user (see domain 4. Theme 12 'Dealing with crisis and coercive measures') and the individually determined agreements on scaling up and down of care. For some care users, this may mean one-on-one counseling. It may also mean that the team can reduce occupancy rates or increase staffing levels according to the severity of care, or adjust work schedules based on the varying intensity of care users' needs. Appealing to solidarity within care departments and the broader care organization is a strategy that can help enable care intensification in one's own department. This implies a willingness to work together, with the needs of the care user at the center above departmental boundaries.

Care intensification may also be necessary in situations where, for example, the team can no longer carry the needs of the care user (temporarily); the team and/or the care user need to “catch their breath” for a while; or when the care user has specific needs that cannot be met within the current department. Structural collaboration with other care units for crisis admission or shared care, with an emphasis on sharing responsibilities and expertise, can help achieve the best possible outcomes here. This could include a temporary transfer to another department within the organization, collaboration with acute intensive care units or even a short-term change of setting to another facility. Open and regular consultation between all parties involved is essential here to ensure continuity and quality of care.

Approaches such as “bed-on-prescription” and “chair-on-prescription” offer additional opportunities for temporary care intensification after care has been scaled down and the care user has moved on to a less intensive environment. Here, the original residence serves as a base to which the care user can return if necessary. This can range from short-term admissions to more frequent contact moments, depending on the needs of the care user. For example, stopping by on weekends for a meal, daily for coffee breaks or joining in a beloved activity. The use of these flexible options allows care users to temporarily return to a familiar environment, resulting in a structured but highly personalized approach, thanks to the existing bond of trust with the team.

| **Theme 4. Upscaling and downscaling care intensity** | | | | |
| --- | --- | --- | --- | --- |
| Not visible | In development | Embedded | Pearl | Comments |
| - The team can easily upscale and downscale care intensity in its own department and according to the individual needs of care users - The team works structurally with other care departments for temporary crisis admission and/or shared care - The team has flexible possibilities to temporarily offer more intensive care to discharged users | | | | |

## Domain 2. The somatic pillar

*The somatic pillar is divided into four themes, namely physical health, eating, body contact and medication management*

**Model description**

People with SPMI have a higher risk, compared to the general population, of developing physical disorders and dying at a younger age2. They often have different body or pain experiences or communicate about pain differently, making it important to always take physical symptoms seriously. Healthcare providers approach pain as “total pain,” looking not only at the somatic aspects of pain but also at the influence of psychological, social and existential factors on the pain experience3,4,14,22. The poorer physical health and shorter life expectancy of people with SPMI can be attributed to several factors, including co-morbidity, unhealthy lifestyle, side effects of medication, and neglect of somatic well-being and self-care22. These factors can also cause contact with one's own body to become impaired, which can manifest as a decline in bodily functions and neglect of appearance. Physical care is then tailored to the care user's individual needs and the team is aware of the power of physical contact, such as a pat on the back, hug or beauty treatment, and can assess which care users may benefit15,24. There is also an increased risk of choking and suffocation in people with SPMI, partly due to *fast-eating syndrome*, but it may have other causes3,14. Once a physical complaint is observed, it is not evident to assess and/or treat it. For example, people with SPMI may have a fear of going to the hospital, show little cooperation during examinations because of their psychological symptoms, or have difficulty following instructions3. In addition, people with SPMI are often stigmatized and their symptoms minimized, resulting in unequal access to quality health care2,3,5,9. Periods of symptom remission can be used to conduct physical examinations and evaluate treatment choices3,14,22. Also, the optimization and evaluation of psychopharmacotherapy is an important aspect within the counseling of people with SPMI. Pharmacotherapy within counseling is characterized by seeking a tailored balance between treating symptoms, creating a livable situation for the care user and their environment, and limiting side effects3,4.

1. **Physical health**

**Workbook:** Physical complaints are identified, assessed and treated in a timely manner. The assessment of physical complaints, including pain, is based on a holistic approach, looking in team at the somatic, psychological, social and existential aspects that may affect the pain experience. In addition, when symptoms and behaviors escalate, the family physician is promptly involved, and vaguely defined or new physical symptoms are carefully assessed. There is sufficient somatic knowledge and expertise within the team to effectively support the physical health of care users; the GP and psychiatrist work closely with each other, as well as with specialists from other medical disciplines to ensure a holistic approach. Treatment is then tailored to the assessment and evaluated regularly.

The team has a good understanding the care user's symptoms and acts as a bridge between the care user and the various practitioners. When appropriate, the care user is accompanied during a medical examination where the attendant represents the voice of the care user. The care user is informed about their physical health and actively involved in making decisions regarding medical treatment. If the care user decides not to be treated, his choice is respected after the assessment of decision-making capacity. This regular assessment of decisional competence in relation to choice of treatment is done in team together with the care user and their context. The care user is asked whether significant others may be informed of the physical health condition and whether they may participate in the decision-making process regarding medical treatment. The team is committed to encouraging screening, but does not impose obligations, as some may find somatic screening intrusive. Moreover, after learning about the results, the healthcare user may be reluctant to make changes based on purely objective measurements. Thus, the effect of and choice of medical treatment is systematically evaluated with the care user, and significant others if desired, to ensure that treatment remains effective and appropriate.

The team knows health risks associated with the lifestyle of care users. Care users are encouraged to live healthy lives and activities are offered that encourage a healthy lifestyle. At the individual level, different aspects of lifestyle are addressed, such as smoking, nutrition, exercise, alcohol and drug use, day-night rhythms and oral hygiene. Sensitization and education are delivered on a tailored basis, focusing on the approach and method to promote a healthy lifestyle, rather than being strictly focused on achieving this goal. For example, tailor-made programs that encourage healthy lifestyles, such as an exercise program, nutritional regimen and individually determined agreements on alcohol and drug use. When lifestyle choices are detrimental to health, the team considers the underlying needs of the unhealthy behavior and formulates an approach to mediate.

| **Theme 5. Physical health** | | | | |
| --- | --- | --- | --- | --- |
| Not visible | In development | Embedded | Pearl | Comments |
| - The team timely assesses the care user's physical (pain) symptoms to understand and, if necessary, treat them - The team performs a bridging function between the care user and practitioner, providing guidance to the care user during a medical examination if needed - The team encourages care users to adopt a healthy lifestyle, provides tailored advice and support, and mediates when lifestyle choices are detrimental to health | | | | |

1. **The eating experience**

**Workbook:** By providing guidance and support around nutrition and reducing risks of choking and choking, the team strives to make the eating experience safe, enjoyable and meaningful for people with SPMI. The team screens care users at high risk of choking, working closely with a dietitian and a speech therapist, who specialize in swallowing problems and their treatment; or there are caregivers on the team with specific training in swallowing problems and their treatment, who can identify care users at high risk of choking and choking using a risk scale. The team also investigates the causes of choking and swallowing; in addition to physical causes, there may be other causes, such as psychological factors. The care user is then offered appropriate treatment and counseling, such as dietary advice, use of assistive devices, behavioral interventions and speech therapy. A team member is always present during meals.

Nutrition plays an important role in encouraging activity and exercise in people with SPMI. It can provide motivation to get up, participate in therapy, participate in activities outside the unit, and experience enjoyment. Care users have a say in meals and are encouraged to participate in activities such as shopping and helping with preparation. Participation in meals contributes to autonomy and quality of life, while helping to prepare them focuses on activation and developing specific skills. Ideally, care users should be offered the opportunity to help prepare meals several times a week. In addition, the team is flexible when it comes to meal times and place, and consideration is given to what is best for the care user in terms of comfort and well-being.

| **Theme 6. The eating experience** | | | | |
| --- | --- | --- | --- | --- |
| Not visible | In development | Embedded | Pearl | Comments |
| - The team provides care users at high risk of choking with appropriate treatment - Care users have a say in meal choices and are encouraged to help prepare them | | | | |

1. **Contact with the body**

**Workbook:** By restoring contact with the body; respecting individual needs for physical care and physical contact, and providing space for healthy experiences of intimacy and sexuality, the team strives to improve the well-being and quality of life of people with SPMI. This contributes to a sense of autonomy, self-esteem and improved physical health.

Physical care support is tailored to individual needs, and to the physical and psychological state of the care user. The team takes into account care users who do not want daily physical care and individual arrangements are made. Setting a clearly defined lower limit for physical care can provide direction for both the care user - they feel heard and respected in their own body - and the team, they know what care activities are necessary and what limits to respect. Establishing this lower bound involves the care user and the team working together to determine the minimum physical care needed for physical health that the care user is comfortable with.
The team recognizes the grieving process surrounding the loss of bodily functions in care users. They provide support to maintain remaining bodily functions and seek alternatives that allow care users to experience maximum autonomy over their own bodies. This may include performing exercises with a physical therapist, taking hearing and eye tests, and providing appropriate assistive devices. The team invites the care user to pay attention to their appearance, for example by making appointments with a hairdresser, pedicurist, buying appropriate clothing and manicures.

Within the treatment and care there is room for reflection on how the care user, and if desired their significant other, can experience intimacy and sexuality. The team creates a safe environment in which these topics can be discussed, while respecting the care user's wishes and privacy, and support them in a healthy experience of intimacy and sexuality. The team provides methods and activities that promote sensory stimulation to help care users reconnect with their own bodies. These activities focus on restoring body awareness and promoting a sense of ownership over the body. For example, a beauty treatment, care massage, wellness, and so on. The team is aware of the power of physical contact, such as a pat on the back, and understands that this can make a positive contribution to restoring contact with the body. At the same time, they respect the wishes of care users who do not like physical contact, for example due to hypersensitivity to sensory stimuli as a result of mental illness.

| **Theme 7. Contact with the body** | | | | |
| --- | --- | --- | --- | --- |
| Not visible | In development | Embedded | Pearl | Comments |
| - The team provides the care user with necessary physical care tailored to individual needs - The team supports the care user in maintaining physical functions and external appearance - The team supports the care user, and if desired significant others, in experiencing intimacy and sexuality - The team offers activities that harness the power of physical contact and sensory stimulation | | | | |

1. **Medication**

**Workbook:** The medication policy within the treatment of people with SPMI is protocolized and based on the latest insights and guidelines; while being tailored to the individual needs of each care user. The goal of the medication policy is to strike a balance between reducing symptoms and minimizing burdensome side effects. This means careful consideration of medication selection and dosing so that treatment is effective while minimizing adverse effects. In cases of therapy resistance, psychopharmacy is optimized, which means paying special attention to the effectiveness of medication when the healthcare user's symptoms do not respond well to previous treatments. In some cases, prescribing *off-label* medication may be useful for controlling symptoms that are not specifically approved for the care user's condition. To optimize medication management, there is collaboration and coordination between the psychiatrist and the primary care physician.

Care users, and if the care user wishes, significant others, are seen as active partners in pharmacological decision-making - their experiences are important in determining the most appropriate medication - and monitoring its effects. The team provides education to the care user, and if desired to significant others, to inform them about medication use and potential side effects. This enables the care user to make informed decisions. Pharmacological evaluation of the medication policy takes place at least once a year, such as during counseling consultations, to discuss the progress of the medication treatment, make any adjustments, and evaluate the effectiveness and side effects of the medication. Guidelines from organizations such as the Dutch General Practitioners Association and the Tapering Consensus Group can be valuable tools for the evaluation process. Ideally, the pharmacist should also participate in the evaluation, as their expertise is valuable in assessing pharmacological aspects and possible interactions

| **Theme 8. Medication** | | | | |
| --- | --- | --- | --- | --- |
| Not visible | In development | Embedded | Pearl | Comments |
| - The psychopharmacology policy specifically focuses on striking a balance between alleviating symptoms and minimizing burdensome side effects - Pharmacological decision-making and evaluation occurs regularly in consultation with the care user, the team and, if desired, significant others | | | | |

## Domain 3. The psychological pillar

*The psychological pillar is divided into four themes, namely the care relationship, therapy and activities, managing symptoms, and dealing with crisis and restraints*

**Model description**

In the context of counseling people with SPMI, the care relationship between caregiver and care user is essential. Establishing and maintaining a meaningful care relationship requires considerable time, effort and dedication and is often perceived as more challenging than with other target populations4,22. Understanding the care user's unique communication style and having effective therapeutic and communication skills can help. For example, using a wide range of communication methods in addition to conventional forms of communication, such as nonverbal interactions3,4,14,15. The care relationship serves as a basis for further interventions, such as exploring, better understanding and effectively treating psychiatric and psychological symptoms and behaviors. Important questions that can be asked to better understand symptoms are: where do his symptoms or behaviors come from? What function do they have? What meaning lies behind them? What is the care user's theory of illness?3,14 Understanding the individual's background and personal history can help answer these questions; and in the care user's case, feelings of disconnection from current reality and one's own life story can complicate this process14,22. Within Oyster Care, then, the focus is not on making a diagnosis, but on understanding the specific function of symptoms within the totality of the personality. Caregivers then seek creative ways to cope with these symptoms and treat only when the care user or their environment is actually suffering. The well-being, individual needs and quality of life of the care user are always at the forefront of this process3,4. Creating the right conditions for contact, alleviating suffering and increasing a sense of well-being is also the approach to therapy and activities. The focus here is not on change or insight; and existing frameworks of thought and methods are creatively translated to the perspective and pace of care users, their cognitive capacities, capacity for introspection and mentalizing, and the severity and nature of their mental vulnerability. Furthermore, Oyster Care is committed to providing a shell, in which care users can step back or take new steps3,4,14. In offering this shell, reducing coercion is paramount, as many people with SPMI faced coercive interventions, such as seclusion, fixation or treatment against their will8,10, in previous treatment pathways. Reasons for this are that this target group is quickly considered by caregivers to be incapable of making decisions; and caregivers' concerns that renouncing coercion will have serious consequences17. Caregivers should thus be supported in making ethical decisions, such as balancing personal autonomy and responsibility to treat; and exploring alternative approaches that are less coercive.

1. **The care relationship**

**Workbook:** The team understands that building a relationship with the care user is an ongoing process, and demonstrates creativity in strengthening the care relationship in ways that extend beyond verbal contact. The care relationship serves as the basis for treatment and counseling interventions. In practice, this is reflected, for example, in negotiations with the care user; caregivers with a good rapport with the care user then often have a greater mandate to act. Understanding the communication style of the care user helps strengthen the care relationship. It is a joint effort of the team, where they make an effort to understand what works and what does not work in the relationship with the care user and what the reasons for this may be. The team also values documenting positive experiences in contact with the care user and shares this information with other team members.

The personal support person assumes an important role in the care process. They represent the voice of the care user and share information between the care user, significant others, the team and other care partners. The choice of personal support person is made in consultation with the care user, as a mutual click is very important. In addition to the needs of care users regarding their personal counseling, possible triggers or obstacles that may make counseling difficult are also taken into account. For example, a specific trait or characteristic of the other person that the care user has incorporated into his disease system, which requires protective anticipation that the care user himself does not always possess. Personal support and counseling is evaluated with the care user at least once a year to make improvements. Since counseling programs are often long-term, both the care user and the counselor may need change at some point. After evaluation, counseling may be retained or transferred; or, for example, a duo system may be used to improve counseling.

| **Theme 9. The care relationship** | | | | |
| --- | --- | --- | --- | --- |
| Not visible | In development | Embedded | Pearl | Comments |
| - The team can demonstrate how they patiently and persistently continue to seek ways to build and strengthen a positive relationship with the care user - The team is committed to understanding the care user's communication style and the meaning of (non-)verbal cues - The care user has a say in who the personal support person is and this choice is regularly evaluated - The personal support person acts as the first point of contact for the care user and acts as a bridge between the care user, significant others and the team | | | | |

1. **Therapy and activities**

**Workbook:** The team works with the care user to develop an individual therapy and/or activity program that provides a dosed level of stimulation. This allows a low-filled schedule to be equally matched to the care user's needs, as it can otherwise create additional stress, pressure and expectations, especially if there is limited ability to cope or strong stimulus sensitivity. The dosed stimulus level helps create a safe environment in which the care user feels comfortable. Over-stimulation can lead to stress and discomfort, while under-stimulation can reduce motivation and engagement. Another important aspect is that care users are invited to participate in therapy and activities based on their own abilities and when they feel able to do so. The choice to participate is respected because the encounter between caregiver and care user is more important than effective participation.

Existing therapeutic frameworks and methods are still important and allow for specialization. Yet thoroughly understanding, and responding to, the needs and pace of the individual care user is of great importance. To this end, familiar therapies and activities are translated into the capabilities of care users; and are aimed at creating the right conditions for contact, utilizing opportunities and increasing well-being. For example, by stimulating past interests and talents that rekindle identity (see domain 5. Theme 16 'Connection, meaning and identity'). To meet individual needs there is a varied range of therapy and activities, both group and individual, with both verbal and non-verbal approaches (e.g. working with animals); demand- and supply-driven. Varied also means that therapy and activities are offered daily, including outside regular working hours and on weekends.

| **Theme 10. Therapy and activities** | | | | |
| --- | --- | --- | --- | --- |
| Not visible | In development | Embedded | Pearl | Comments |
| - The team establishes a therapy and/or activity program together with the care user - The team translates existing thinking and methods into therapy and activities according to the needs and abilities of the care user - There is a varied offer of therapy and activities | | | | |

1. **Dealing with symptoms**

**Workbook:** The psychological symptoms and behaviors of care users are assessed and examined by the team; during a daily consultation and structured team meetings. The team tries to sense and understand what cannot be said or experienced, but what manifests as “ nonstandard” behavior; and seeks how to give words to this. Symptoms and behaviors include lack of initiative and difficulty in taking action. Several disciplines are involved in these discussions, creating a holistic picture of the care user from different perspectives. When examining symptoms and behaviors, the focus is shifted from the symptom itself to the underlying desires, wishes, feelings and unmet needs of the care user. To do this, it is essential that the team know the care user and their life story well; and use creative methods to identify this story. Treatment of symptoms and behaviors occurs when the care user or those around him is actually suffering from, and suffering from, the symptoms; with a radical commitment to improving the care user's quality of life. Fulfillment of “quality of life” is determined through dialogue and alignment with the care user, and not based on values and norms of the team or significant others. When specialized psychiatric and/or psychological care is needed, the team works closely with experts to provide targeted psychological counseling and treatment.

| **Theme 11. Dealing with symptoms** | | | | |
| --- | --- | --- | --- | --- |
| Not visible | In development | Embedded | Pearl | Comments |
| - The team assesses care users' symptoms and behaviors to better understand and, if necessary, treat them - The team is familiar with the care user's life story and uses it as a basis for assessing symptoms and behaviors - The team treats care users' symptoms and behaviors with subjective quality of life as a starting point and until it is acceptable to each person | | | | |

1. **Dealing with crisis and coercive measures**

**Workbook:** The team is proactive in recognizing early signs of crisis in the care user; investigates what is underlying the crisis behavior; and works with the care user to find less harmful alternatives for expressing feelings of distress and crisis. Examples include the use of mindfulness and breathing techniques, aggravating materials, and a signaling plan, which may include both effective and ineffective strategies. If a signaling plan is used, it should be written in the language of the care user; and drafted and evaluated with the care user and any significant others. At least once a year and after each crisis, the plan is reviewed and updated. The use of risk tools can be valuable, but this should always be considered in the context of each individual care user. In addition, it is important to carefully analyze the crisis situation and, if necessary, conduct a psychiatric evaluation to better understand the underlying causes of the crisis behavior. Education and training in recognizing early signs of crisis, mental illness and psychopathology enables caregivers to anticipate and respond quickly to crisis situations and provide appropriate support.

The team thus strives to share responsibility and take positive risks whenever possible. This contributes to the care user's autonomy and self-esteem. Nevertheless, there may be situations where the care user's need for care increases; or where the care user's behavior and decisions cause disproportionate harm to themselves or others. Caregivers then create an (emotionally) safe and structured environment by closing the shell to provide protection; and applying psychoanalytic concepts such as “holding” and “containment.” When the need for care decreases and the care user's behavior and decisions are less harmful, the “shell” opens again. After a crisis or aggression incident, aftercare is provided to those who need it. It is important to recognize that some people may have difficulty verbally processing a crisis incident and therefore may benefit from other forms of attention and support. The team is familiar with the crisis development model, works with *best practices* in the areas of conflict management and personal safety, and annually commits to education and training on these topics.

The team applies coercive measures exceptionally and of short duration under strict conditions that can be justified and evaluated. The use of coercion is not an individual decision and must be preceded by a team consultation. It is important not to motivate coercion too quickly and to look for possible alternatives. The use of coercion is thus tested against the principles of effectiveness, proportionality and subsidiarity. For example, coercion should be proportional to the distress it causes and the (self) harmful behavior that is restricted by the coercive measure. Coercion can include treatment against one's will, isolation and fixation, forced medication or restriction of personal freedom without the consent of the care user. The use of coercion can also be more subtle, such as not allowing weekend leave or withholding money until the care user has been bathed. Some interventions may be considered coercion, but are perceived by the care user as providing a sense of safety and security.

The motivation for coercive measures is noted in the record, as well as the manner, time and persons involved in the evaluation. Contact with the care user is maintained during the use of restraints, in which positive treatment, transparency about the intervention and agreements about the duration of the measures are important. Evaluation is done with the care user, and significant others can be involved while respecting the care user's privacy. Evaluation results are noted in the electronic health record; and the alert plan if available. The team consults with an ethics consultation when restraints are used for an extended period of time; or when there is extensive coercion. The team annually evaluates the use of (in)formal coercion and power and improvement actions are designed to reduce the use of coercion. It is recommended that an ethics consultant be involved in this team meeting or bring in an outside perspective. Ad hoc trainings are conducted to minimize the use of coercion.

| **Theme 12. Dealing with crisis and coercive measures** | | | | |
| --- | --- | --- | --- | --- |
| Not visible | In development | Embedded | Pearl | Comments |
| - The team recognizes early signs of crisis in the care user and offers tailored methods and tools to learn to deal with crisis in a healthy way - The team demonstrably works from the shell metaphor - The team annually evaluates their use of (in)formal coercion and power, and formulates improvement actions to reduce the use of coercion. | | | | |

## Domain 4. The social pillar

*The social pillar is divided into three themes, namely family and significant others, activation, and social participation and inclusion*

**Model description**

People with SPMI can experience serious consequences in terms of relationships and social functioning due to their condition. The prolonged hospitalizations, the nature and consequences of their condition, communication difficulties and feelings of powerlessness among those around them may be reasons for this. This results in a limited social network, damaged or broken relationships, and feelings of loneliness or social isolation3,22,23,24. Family members and others who do remain have often gone through or are still in the process of going through a period of mourning. They face the impact of the condition on their loved one's life, as well as its impact on their own3,4,13,14,15,19,20. People with SPMI their contacts are mostly limited to other caregivers and caregivers. Especially in situations where family members are not present, caregivers are often closest to these individuals, leading to a unique dynamic of professional closeness3,10. On top of the interrupted and disconnected contacts on a personal level, this target group often experiences interruption in contact with and feelings of alienation and rejection by society. They prefer not to actively participate and prefer to stay “inside” the facility because they experience pain when they are “outside". It is therefore essential that the team work to counteract processes of institutionalization and (self) stigmatization; help the care user to take up their citizenship and rights; and create opportunities for these people to reconnect with society. This does not focus on resocialization, but rather on supporting care users in their desire to belong and be meaningful4,14. One way of doing this is by establishing contact with non-psychiatric affiliated organizations in society, collaborations in and with the local community and using existing initiatives rather than just activities within the hospital setting22,23. Caregivers thus play an important role as quartermasters; as bridge figures between the care user and the outside world, and volunteers can also take on this role15. In addition to the challenges that people with SPMI experience in building or maintaining relationships, they may experience various challenges in basic life skills such as personal hygiene, food preparation, money management, social support, work, learning and leisure activities. They are often unemployed, working in sheltered or supported employment, or have a limited work history. This can make it difficult for them to find work in the regular labor market. The variable nature of the condition can have a major impact on the person's ability to independently perform essential life skills, with caregivers sometimes taking over more tasks than necessary22,23,24. Within Oyster Care, caregivers seek a balance between providing necessary, tailored support that meets fluctuating support needs; strengthening self-esteem and self-confidence; and fostering autonomy, thereby enhancing the ability of people with SPMI to cope with challenges in the social life domain.

1. **Family and significant others**

**Workbook:** Within Oyster Care, there is a specific focus on investing in the care of next-of-kin and recognizing their lifelong commitment. For example, the team identifies individuals from the past who are important to the care user and explores why contact with them has been broken or disconnected. It then considers with the care user whether it makes sense to restore these relationships, such as through family system conversations. These considerations to re-establish relationships take place in an ongoing process, as care users may initially be reluctant to re-establish contact. At the same time, ways can also be sought to allow the context and meaning of these relationships to exist without actual contact, such as writing “a letter to my mother” that is not sent.

In addition, care users are actively guided in nurturing their existing contacts; maintaining and strengthening these relationships and building a reciprocal relationship. This can be done, for example, by purchasing small gifts that the care user can give to their significant other as a token of appreciation, writing a birthday card together, learning to use online communication tools to communicate remotely, organizing dinner for family on the ward, offering games to connect with (grand)children, and so on. Among other things, this also contributes to breaking away from the dynamics of “patient-caregiver” and (re)discovering and incorporating one's own roles, such as brother-sister, mother-child.

The team actively provides the involved network with information about the condition and caregiver support, as well as practical and emotional support. They do this by regularly discussing what can help them care for the care user, both during low-key contact moments and during structured meetings such as the support meeting. Practical support is offered, such as providing information about outside organizations such as Similes and other peer groups, arranging travel so the care user can visit family, discussing how to divide caregiving tasks, and so on. In addition, the team provides significant others with emotional support, allowing for sharing concerns, offering psychological counseling and providing tailored psychoeducation. The team supports the family in a way that respects the care user's privacy while not disrupting the bond between the team and the care user.

The team organizes initiatives on a regular basis where significant others and care users can meet and connect in an approachable way, away from the traditional “patient-caregiver” dynamic. Also, such initiatives allow significant others to connect with other next-of-kin, which can be a valuable source of support and understanding. By connecting with others who have similar experiences, they can gain practical knowledge, receive emotional support and build strength of resilience.

Within the healthcare environment, a special connection can develop between the team and the caregiver, resulting in a unique dynamic of professional closeness. Within Oyster Care, precisely this connectedness provides opportunities within the support process. The connectedness is regularly expressed in the actions of caregivers who often consciously choose this population. For example, going out together, adapting personal work schedule to the needs and mental state of the care user or running errands for persons who are unable to go outside. However, this can also be a pitfall for caregivers. Because of their important position in the lives of care users, they may unconsciously assume the role of family. This creates a greater emotional involvement, which can be influential in making certain decisions, or it can create expectations on the part of the care user that are similar to those they have toward their family, but which caregivers sometimes cannot fulfill. It is important for caregivers to be aware of this, and to be able to talk openly in the team about what professional closeness means to them and how they define their role as a caregiver. These issues can be appropriate topics for intervision and supervision

| **Theme 13. Family and significant others** | | | | |
| --- | --- | --- | --- | --- |
| Not visible | In development | Embedded | Pearl | Comments |
| - The team investigates who was important to the care user in the past, why contact was broken and focuses on healing the disrupted relationships - The team supports the care user in maintaining, nurturing and strengthening existing contacts - The team actively offers significant others practical support in caring for the care user - The team actively offers significant others emotional support in caring for the care user - The team regularly organizes initiatives where significant others can meet each other, as well as the care user, in an approachable way | | | | |

1. **Activation**

**Workbook:** The team provides care users with a tailored, predictable structure of activities and contacts so that they can lead as active and autonomous a life as possible. To activate and connect care users with others and the world around them, the team regularly invites them to participate together in everyday, social life; such as a visit to the market, a café or a performance. The team visually shows what the weekly activity schedule will look like. It offers care users security by making the environment reliable and predictable, and can help them get a grip on life.

The team focuses on promoting learnability and activation so that care users can perform common daily activities independently, such as using public transportation, the computer, keeping a calendar, grocery shopping, laundry and small work activities. This may include, for example, care users receiving step-by-step guidance and training to learn routines and develop skills. In addition, care users are guided in organizing their administrative affairs and making financial decisions. If a budget manager is appointed, the team facilitates positive contact between the two parties and regularly evaluates the extent to which the care user still needs this support.

The team commits to volunteer work to bring the outside world inside and also to activate care users to go outside. First and foremost, a match is sought between the volunteer and the care user(s); shared interests and compatibility are considered. New volunteers are well informed about working with the population and are prepared for the challenges they may encounter. This helps create realistic expectations and promotes successful collaboration. Volunteers are considered part of the team; they are informed about the ins and outs of the unit; and appreciated for their efforts. They are given access to the materials and resources needed to do their job well. In addition, volunteers have a point of contact and the team actively deals with feedback from volunteers to improve cooperation and address any bottlenecks. Regular meetings are organized where volunteers can share experiences with each other, discuss questions or concerns, and where they are thanked for their efforts. Upon completion of the volunteer work, a final interview is offered to the volunteer. This provides an opportunity to discuss and learn from the volunteer's experiences and feedback.

| **Theme 14. Activation** | | | | |
| --- | --- | --- | --- | --- |
| Not visible | In development | Embedded | Pearl | Comments |
| - The team together with the care user participates regularly and in a tailored way in everyday, social life - The team supports the care user to grow in independence in carrying out daily activities and provides support where needed - The team makes an effort to recruit volunteers and establish sustainable cooperation | | | | |

1. **Social participation and inclusion**

**Workbook:** The team actively works to counteract processes of institutionalization and (self) stigmatization; to help people with SPMI connect with society; and to get these people to take on roles other than that of care user (see domain 5. Theme 16 'Connection, meaning and identity). They strive to create an environment where care users feel welcome, work to create positive images around SPMI, and build connections with the local community. This can include providing information about life on the ward, providing educational activities, regular contact with local community participation boards, and inviting local residents to learn about the target group and treatment vision.

The team is committed to creating a bridge between the outside world and care users, so that they can feel connected to what is happening in society, even if they are unable to go outside. This can be done through various initiatives, such as offering newspapers and magazines to care users to keep them informed about current events; regular conversations, both individual and group, about the news and social trends; offering activities related to current topics, and so on. These opportunities provide a platform for exchanging opinions and sharing ideas, contributing to a sense of belonging to society. In addition, in order to build a bridge to the outside world, efforts are also made at the departmental level to counter institutional processes and (self-)stigmatization and promote participation of care users. In departmental working groups, for example, the focus is on care users' input and involvement in line with the principle: “Nothing about us, without us. Moreover, regular meetings are organized where the team and care users jointly reflect on departmental operations and future activities. Significant others may also be invited to participate in these to engage in inclusion and collaboration.

To create connection between the outside world and care users, the team also organizes initiatives to bring outside life to the ward. At the individual level, the team looks at opportunities for the care user to participate, and contribute, to community life. This can range from participating in activities at a local service center, working with animals at a care farm, volunteer opportunities, depending on the care user's interests. In addition, at the meso level, contact is made with local associations and through methodologies of quartermaking, space is made for participation of care users. The team organizes events near the facility that manage to break the stereotypical image of people with SPMI, while respecting their privacy. If celebrations are organized within the community, the team participates with the care users in (in)direct ways, such as, for example, a booth with products made by care users. At the macro level, the team identifies structural barriers faced by care users and brings them to the attention of local authorities, as a form of policing.

| **Theme 15. Social participation and inclusion** | | | | |
| --- | --- | --- | --- | --- |
| Not visible | In development | Embedded | Pearl | Comments |
| - The team organizes initiatives, and works with various methods, to bring community life inward - The team organizes initiatives at various levels, and forms sustainable partnerships, to bring inside life outside in the community | | | | |

## Domain 5. The existential pillar

*The existential pillar is divided into two themes, namely connection, meaning and identity; and spirituality, worldview and religion*

**Model description**

People with SPMI may have life experiences characterized by institutional care, (self-) stigmatization and deviation from what is considered normal22. They may experience feelings of loss, grief and mourning as a result of the challenges they have endured; struggle with the meaning of their existence and finding a sense of fulfillment; and have difficulty connecting with others and the world around them3,4,15,18. People with SPMI thus suffer both from the disorder itself and its consequences; and the experience of powerlessness and meaninglessness is expressed in behavior rather than words. Yet this does not mean that a fundamental life attitude of hope is no longer possible3,14. Recognizing the human need for meaning and connection, and restoring a sense of meaning, dignity and hope even in the midst of challenging circumstances, are central to Oyster Care. The “shell” provides an external structure to help care users experience meaning by supporting them in their search for connection. The person's essence and remaining seeds of meaning and self-worth are sought in word and deed, encouraged to grow4,14. In addition, spirituality, worldview and religion can play an important role in coping with a severe and persistent psychiatric disorder. It can help the person seek meaning, promote resilience and hope, and find inner strength and peace. The team has a responsibility to (re)recognize the religious and spiritual needs of care recipients and to guide and support them in this. This includes respectfully listening to the person's personal experiences and desires in this area; and supporting them to actively explore and express their spirituality and faith. In addition, collaboration with spiritual caregivers, meaning care and pastoral care staff or representatives of religions or worldviews is valuable in providing the care user with specific guidance in the spiritual or religious area3,14,15.

1. **Connection, meaning and identity**

**Workbook:** The team recognizes and understands feelings of hopeless existential suffering and grief arising from the loss of life dreams, relationships, health and self-worth. They provide an external structure through which care users (re)discover values important to them, find meaning and experience purpose in their daily functioning. The team is also committed to enabling care users to experience a meaningful and fulfilling connection to various aspects of life; and works with the care user to experience connection with themselves, others, nature and the transcendent. They make this connection happen through all pillars of care, drawing inspiration from Tielens and Prouty's ideas on restoring contact with everyday reality and reducing feelings of isolation, among others.

The team uses a strengths-based approach, focusing on care users' own sources of strength. By identifying care users' wants and needs, and showing genuine interest in their personal interests, their unique talents, qualities and motivations can be discovered. This can ultimately lead to finding appropriate activities that highlight these strengths; a quiet and safe place where the care user can be themselves and tap into their strengths can be sought together.

In order to get more in touch with the care user's environment; to better understand care users against the background of their life story; and to get the care user in touch with his own life story and identity, various methods are applied that are tailored to the individual. For example, the team explores the life story with the care user, and if possible with significant others, to restore identity and strengthen autonomy. In addition, for some care users, going back to an important place can help bring back memories and inspiration about what was important to them, perhaps lost and can be picked up again. Another method to get closer to the lives of care users and support care users to stay in touch with their life story and identity is “The Story from the Closet. “The Story from the Closet” was developed by the pastor and psychologist of a Oyster ward, inspired by Japanese storytelling theater or ‘kamishibai’ and pre-therapeutic and narrative methodologies. By reading aloud a story that connects with the caregivers' interests and lifestyles and working with picture books and coloring pages, they invite caregivers to talk, either about the story they have heard or their own. These sessions help not only the caregivers to get closer to the life world of the care users, but also the care users themselves to stay in touch with their own life story and identity. They can help discover wishes, interests, needs, which can lead to improvements in quality of life and appropriate activities. Reading and storytelling activates concentration, memories and imagination, makes room for questions of meaning and can bring people together, help connect and break social isolation.”

The team encourages the person to take on other roles in addition to the role of caregiver. This could include having conversations about everyday topics and not just the condition, involving the care user in (sharing) household chores, letting the care user take responsibility for a specific task, and so on. By dealing with the care user in an equal manner; treating the care user as an active partner; and having the care user actively participate in everyday activities and take on responsibilities, the focus is shifted from the condition to other aspects of life. This can help (re)discover skills, restore a sense of self-worth, independence and self-reliance, engagement with the world around them, and meaning and purpose in daily functioning. Care users are also encouraged to mean something to others. For example, care users learn to help others, participate in a charity benefit activity, knit hats for the staff, or draw pictures to decorate the ward. In this way, care users can use their talents and abilities to help others; connect with others; and have a positive impact on the community. This contributes to greater self-esteem, meaning and connection.

| **Theme 16. Connection, meaning and identity** | | | | |
| --- | --- | --- | --- | --- |
| Not visible | In development | Embedded | Pearl | Comments |
| - Together with the care user, the team discovers (former) interests, sources of strength and motives and actively searches for a place where the care user feels safe and can bring out qualities - The team works with verbal and non-verbal methods to get more in touch with the world of the care user and also for the care user himself to stay in touch with his own life story and identity. - The team supports the person in taking on roles other than that of care user - The team supports the care user in being meaningful to others | | | | |

1. **Spirituality, worldview and religion**

**Workbook:** The team recognizes and supports the spiritual and religious needs of care users by creating an open and respectful environment for such questions and collaboration with experts. The team identifies spiritual and religious needs with the care user and regularly evaluates whether these needs are still actual and adequately addressed. Thus, the team is open to spiritual, religious and philosophical questions; listens without prejudice and also provides concrete support in practicing spiritual and religious practices, such as offering food and beverages that meet dietary requirements, marking religious holidays and accompanying care users to religious services or activities relevant to their beliefs.

In doing so, the team works with experts in the field of religion, worldview or spirituality, such as a spiritual care provider, a pastoral care staff member or a representative of a religion or worldview. If no expert is available within the facility in the (faith) belief or religion of the care user, external expertise is sought. It is important that sufficient information is exchanged between the expert and the team, but also that space is created where the care user can share confidential information that remains between the two of them. The expert can interact quickly with the team to ensure good collaboration.

The team feels competent to recognize existential themes and deal with important life questions. Existential themes are those that everyone faces in their lives, such as death, fear, loneliness, loss, freedom, responsibility and choices. Important life questions are about existence. It relates to who we are, what life means and the deeper grounds of our existence. It is about mortality and finitude, sometimes also about eternity, an existence hereafter, about purpose and meaning. The team understands the importance of these themes in the process of grieving and coping; and can offer support in a variety of ways and on a tailored basis. Exploring existential themes can be done through individual conversations, as well as through individual or group activities involving both team members and caregivers. These activities provide space for reflection, sharing stories and exploring spiritual and meaning questions. The team uses nonverbal methods, such as photographic materials and poetic texts, to encourage care users to get in touch with their own experiences.

| **Theme 17. Spirituality, worldview and religion** | | | | |
| --- | --- | --- | --- | --- |
| Not visible | In development | Embedded | Pearl | Comments |
| - The team identifies spiritual and religious needs with the care user and regularly evaluates these needs - The team guides the care user in practicing spiritual and religious beliefs, values, traditions and practices - The team collaborates with experts who can guide the care user in spirituality, worldview or religion - The team explores existential themes with the care user and feels able to deal with life questions, grief and powerlessness based on the individual needs and abilities of care users | | | | |

## Domain 6. End-of-Life care

*High quality palliative care for care users in the last phase of life requires a careful and coordinated team approach so that efforts can be made to maintain and/or improve quality of life, quality of care and autonomy.* *End-of-life care is divided into three themes, namely early care planning, end-of-life care and post-death care*

**Model description**

People with SPMI, compared with the general population, have a higher risk of developing physical illness and dying at a younger age2. Yet these people experience several barriers to good end-of-life care. These barriers include unequal access to health care, stigma among health care providers, fragmentation of care, and gaps in professional knowledge. This leads to a lack of coordinated care for people with SPMI at the end of life, and caregivers feeling incompetent in this area2,5,16,22. Moreover, people with SPMI are often not involved in conversations about end-of-life care, possibly because of presumed limited decision-making skills7,16,20. However, research has shown that the expectations of these people regarding end-of-life care are similar to those of the general population. Expectations include preservation of autonomy, support from friends and family, maintenance of quality of life and expert care. These individuals are able to make decisions; and actively participate in care planning, provided that conversations are conducted with respect, patience and empathy; and in an appropriate context, where the person is stable and open to such conversations2. Within Oyster Care, it is therefore important to establish a coordinated system that integrates the principles of palliative care with end-of-life care for people with SPMI. This includes not only recognizing the last stage of life, but also providing customized educational interventions, support and grief counseling for both caregivers and their loved ones. Tailored educational interventions and having open and honest conversations about the realities of end-of-life care support care users in making choices about their end-of-life preferences2,16,20.

1. **Advance care planning**

**Workbook:** Advance care planning is an important aspect of high-quality palliative care. The team recognizes the impending end of life and ensures that the care user and significant others receive the best possible care that addresses their needs and wishes. The team invites care users and their loved ones to discuss their wishes and preferences for end-of-life care. This is especially important for care users who are dealing with a serious physical illness, their health is declining significantly, or for those who initiate this conversation themselves. The team understands that discussing end-of-life care with people with SPMI can be a delicate and complex issue. When approaching this topic, careful consideration and timing are essential. Indeed, people with SPMI can be sensitive to emotional stimuli, and talking about end-of-life care can evoke deep fears and concerns. It is important to choose the right time when the care user is stable and open to such a conversation. This should take into account the care user's personal condition so that, for example, he does not get the idea that he will die immediately, which can reinforce pathological thinking patterns. Empathy, respect and patience are important prerequisites for discussing sensitive topics, such as end-of-life care.

Advance care planning includes identifying the values of the care user and their caregivers; discussing care goals; and exploring preferences for upcoming care, such as the place of end-of-life care, and what they do and do not want from interventions anymore. Care planning is documented in writing, such as in a living will, by appointing a representative, establishing a DNR code, and so on. Evaluation of care planning occurs regularly, especially when care goals change or the care user's condition worsens. Although talking about euthanasia may not come naturally to all team members, care users are counseled if they ask questions about it. For this, the team can partner with services such as Reakiro and LEIF, which offer expertise in this area.

| **Theme 18. Advance Care Planning** | | | | |
| --- | --- | --- | --- | --- |
| Not visible | In development | Embedded | Pearl | Comments |
| - The team actively invites the care user and significant others to think together about advance care planning. Their values are identified, care goals discussed and preferences around future care explored, documented in writing and reviewed regularly - The team guides care users in their euthanasia request | | | | |

1. **End-of-life care**

**Workbook:** In the last phase of life, the focus is on comfort care and how to improve quality of life and increase comfort so that people can die in peace. It is essential that the care user and loved ones actively receive accurate information about the diagnosis, course of the disease, treatment options and palliative care options; as well as emotional support and guidance on the complex feelings, fears and uncertainties associated with the nearing end of life, so that they can face the challenges of this period with greater resilience and understanding. Peer care users also receive accurate information, while respecting the care user's privacy, and emotional support so that they can make sense of the situation and cope with their own feelings of loss, which are sometimes evoked by the confrontation with another person's approaching end of life.

With this information, the care user, significant others and the team can develop a palliative care plan that maximizes support for the care user's physical, emotional, social and spiritual needs. Even in situations where limited resources and facilities are available, care is focused on compassion, empathy and respect for the person. This means that caregivers do their utmost to provide the care user with a comfortable environment in which their wishes are central. For example, by making extra efforts to provide the care user with a comfortable room, enabling visits and goodbyes, paying special attention to their diet, selecting appropriate music to create a peaceful atmosphere, and so on. The team assesses overall symptom burden such as pain, anxiety, confusion and shortness of breath on a daily basis. The team regularly reviews the palliative care plan with the care user and significant others, preferably once a week, to ensure that the care plan meets the changing needs of the care user. The palliative care plan and its evaluations are kept in the electronic health record.

Providing palliative care requires a lot from a team, so it is essential for the manager to have regular consultations with the team to assess the team's capacity to cope and take measures to strengthen it. Ethical consultation can support in increasing coping capacity and provide direction when making end-of-life care decisions. Ideally, the team should have the ability to use additional staff temporarily so that they can provide one-on-one care to the care user when needed. Annual continuing education in palliative care enables team members to provide high-quality care. Adding a team member with specialized training in palliative care also contributes to the quality of care; or the team can quickly connect with a local palliative home care service to jointly care for palliative care users. This collaboration allows teams to gain the expertise and support needed to provide end-of-life care. It is also necessary for the team to feel supported 24/7 by physicians, preferably a physician who knows the care user, to ensure that the care user receives the best possible care. Sometimes the choice is made, both by the team and by the care user or their loved ones, to transfer care to a more specialized palliative unit. In this case, the team stays in close contact with the palliative unit.

| **Theme 19. End-of-Life Care** | | | | |
| --- | --- | --- | --- | --- |
| Not visible | In development | Embedded | Pearl | Comments |
| - The team actively provides accurate information - diagnosis, disease progression, treatment and palliative care options - and emotional support to the care user, significant others and fellow care users - The team develops and regularly reviews with the care user and significant others the palliative care plan. The care plan focuses on comfort and puts maximum emphasis on meeting the care user's wishes and needs. - The team is supported 24/7 by availability of physicians; specialty palliative care service and/or “palliative care” reference person within the facility; and training - The manager regularly evaluates the team's ability to cope while providing end-of-life care and takes measures to increase the ability to cope | | | | |

1. **Post-death care**

**Workbook:** The passing of a care user is an emotionally charged moment for the team. The passing may result from a long-term palliative situation, or it may result from a sudden event such as cardiac arrest or suffocation. Regardless of the circumstances, it is vital that the team create opportunities to say goodbye to the care user in a dignified manner. This can be done, for example, by organizing a memorial service or setting up a specific farewell area on the ward. Initiatives are designed to enable symbolic farewells and give people the opportunity to say goodbye in a way that suits them. Fellow care users and significant others may need contact with someone from the team, such as someone who had a good relationship with the care user, to express their feelings and experiences surrounding the loss; and grief counseling is also provided to those who need it. Ideally, after each passing, the deceased's room is kept vacant for some time. This gives the family time to clear the room; and fellow care users and team members have time to make sense of the loss. The team holds sufficient team meetings to discuss the impact of the death on the team itself; and to evaluate the end-of-life care provided to allow for improvements. Thus, the team is committed to facilitating a dignified goodbye, providing support to significant others and fellow care users; and evaluating end-of-life care.

| **Theme 20. Post-death Care** | | | | |
| --- | --- | --- | --- | --- |
| Not visible | In development | Embedded | Pearl | Comments |
| - The team provides several opportunities to say goodbye to the care user in a dignified manner - The team actively offers fellow care users and significant others the opportunity to talk with someone from the team about (the loss of) the person and provides grief counseling - The team sets up sufficient consultation to talk about what the death brings to the team and to evaluate the end-of-life care provided | | | | |

## Domain 7. Teamvision, -culture and -development

*The team vision, team culture and team development domain focuses on the importance of a shared mission and values within a healthcare team, how this contributes to a positive team culture and how continuous growth and collaboration improve the quality of care.* *The seventh domain is divided into three themes, namely attitude; professionalization, innovation and quality of care; and leadership*

**Model description**

Supporting people with SPMI involves complex processes and can demand a lot from caregivers. Therefore, it is important that caregivers develop a strong vision of care, work together in a positive team culture, and continually work on this3,22. Indeed, a shared vision of how to meet the needs of care users and their families; rooted in compassionate care and practices, can support caregivers to accompany care users in their suffering, staying close to their world and perspective (cfr. Baart's presence theory). Also, vision development is important to stay present beyond powerlessness when faced with severe loss experiences3,8,10,13,20. Moreover, having a condition can make people vulnerable in their functioning, and certainly people with SPMI are often dependent on caregivers. Such dependence frequently results in an unequal knowledge and power relationship between care user and caregiver. Caregivers can reduce this inequality by creating a safe and supportive environment in which care users feel heard and respected. This requires a conscious effort by caregivers to focus counseling on staying connected to the still healthy functioning part of the person; and to focus the care relationship on protecting the person's integrity, respect, dignity, hope and not giving up3,4,22. Another fundamental aspect is caring for caregivers themselves. Assisting people with a serious condition can have a great emotional impact. Therefore, it is essential to create an environment of resilience, self-care and mutual support. Adequate appreciation for the work from policy can contribute to this. Furthermore, there is a need for a climate of open communication in which everything remains discussable. For example, through regular supervision and intervision, to avoid, for example, negative countertransference and paternalistic attitudes towards the person with SPMI3,4,15,16,22. In order to meet the individual needs of care users and their relatives, there must be sufficient and competent caregivers who can continuously develop professionally. This means sufficient investment in educational opportunities and training. For example, training on what SPMI entails; skills to deal with the complex problems that people with SPMI experience, by actively listening, providing interpersonal support and representing the person's voice; as well as training in recognizing somatic symptoms, handling crisis and coercive interventions and providing end-of-life care. In addition to education and training, the team invests in creative, innovative and out-of-the-box thinking in counseling because known *evidence-based* treatments, established protocols and guidelines often do not work with this target population3,4,8,15,22. Structurally realizing Oyster Care therefore requires good leadership: it takes moral courage to give caregivers sufficient freedom to engage creatively; and consistent policy choices must be made in which care users and loved ones are seen as active partners3,4,23. Professional freedom is needed, for example, to allow flexibility in dealing with rules when it is conducive to the well-being of the individual. Indeed, it can be difficult for people with SPMI to adhere to departmental and treatment agreements22. Good leadership can also be seen in keeping administrative responsibilities low, setting reasonable goals and ensuring adequate staffing, including from the therapeutic and psychological team, so that individual attention can be given and everyone's needs met15.

1. **Attitude**

**Workbook:** The team approaches care users with a positive and respectful attitude aimed at fulfilling their potential, protecting their integrity and dignity, and where equality is a core value in counseling. Thus, the team strives to find connection with the still healthy functioning part of care users. This means that they actively seek out the abilities and capabilities of each individual care user, and use these as a starting point for counseling. Another principle in counseling is to protect the integrity and dignity of care users. This means that they always act with the utmost respect for care users' personal boundaries and privacy. They are committed to creating an environment where the care user feels safe and respected. There is an open and accepting atmosphere within the team where care users can “be” and where the sometimes “strange” is respected as long as the situation remains safe for themselves or others. The care user feels accepted and recognized as a full individual. In addition, equality is central to their interactions with care users. The team recognizes that the care user is the expert when it comes to their own life and well-being, and they encourage collaboration and communication to achieve shared goals.

All team members are familiar with the principles of “presence” and consistently integrate these principles into their daily work. Although team members are familiar with the concept of presence, putting it into practice is often challenging. It often feels safer to focus on practical tasks. Presence theory, developed by Andries Baart and rooted in care ethics, provides valuable guidelines for caregivers to approach caregivers in their suffering; the theory emphasizes a focus on interdependence and connection, with an understanding of human vulnerability and responsibility. It offers caregivers tools to approach care users with an open, not only active, but also expectant, accepting and wondering attention; the ability to listen and be attentively present to the existential needs of care users.

To continue caring for this population, an environment of resilience, self-care and mutual support is needed. The atmosphere within the team is pleasant; there are few signs of overburdening, instead the team is characterized by energy, determination and decisiveness; and there is a sense of “caring for caregivers,” as they too must learn to cope with powerlessness. This is fostered by regular activities such as team building and ward celebrations, and experiencing a work-life balance. Furthermore, there is a need for a climate of open communication where everything can be discussed and team members can trust each other. The team feels safe with each other to vent, ask for support, as well as to give each other feedback and to receive feedback; and there are productive dialogues to reach agreement on how the team works, outlining guidance, and so on.

This commitment to accessibility is put into practice daily, with team members visually indicating who is available in the ward at that time. Team member doors remain open whenever possible, and a team member is always present and available in the group for questions and conversations. The team actively informs care users, loved ones and professional care partners about how they can always get in touch with a team member, and visiting hours are handled with flexibility. In addition, the team warmly welcomes significant others and actively engages with them, respecting the care user's privacy. They ask about the experience of the visit, which is a low-threshold way for loved ones to share thoughts, exchange reflections and keep abreast of what their loved one is going through and experiencing, especially since the person may sometimes have difficulty putting into words their own feelings and state of health.

| **Theme 21. Attitude** | | | | |
| --- | --- | --- | --- | --- |
| Not visible | In development | Embedded | Pearl | Comments |
| - The team seeks to connect with the still healthy functioning part of care users, focuses on preserving the integrity and dignity of care users and acts on the basis of equality - The team knows the principles of 'presence' and applies them consistently in their daily work - There is a healthy team spirit in which self-care, mutual support and open communication are central - There is a culture of availability and accessibility for care users and their relatives | | | | |

1. **Professionalization, innovation and quality of care**

**Workbook:** There is an knowledgeable and innovative team that constantly questions its own operation to improve the quality of care. In Oyster Care, where tailored work is central and each care user requires a unique approach, induction of new staff is essential. New employees must be thoroughly briefed on individual support plans and commitments; and actively supported in understanding Oyster Care. Mentoring, introduction training and regular meetings with a supervisor can be used for this purpose. This process ensures that the team maintains consistency and quality in an environment where each care user requires a different approach, ultimately resulting in better care for and contentment of the care user.

The team demonstrates remarkable creativity in envisioning appropriate support methods to meet the diverse needs of care users. This requires an environment that encourages the development of out-of-the-box ideas and allows for professional freedom. In addition, the team demonstrates innovation in conceiving initiatives to provide quality Oyster Care. To nurture this creativity, the team can count on easy collaboration with other Oyster Care partners and teams. For example, visiting each other and participating in forums such as the Oyster Care Forum, the Oyster Care peer review group and consulting the website can provide valuable insights and fresh perspectives. Appointing a communications liaison can ensure that all staff are informed and inspired by these ideas.

The provision of education and training is imperative for the professionalization of the team, and thus for the quality of care. The team regularly invites experts who provide training on (new) (treatment) perspectives, insights and methodologies. It is advisable to tailor the training to the target group. For example, if there are mainly elderly residents, there should be sufficient expertise in elder care. Attending training sessions is not only necessary to increase knowledge, it is also a way to gain new *evidence-based* insights, but followed by a careful translation to one's own target group. The supervisor, together with the team, identifies specific training needs and evaluates them regularly. Although it is recommended to offer at least four half-days of training per year per employee, the relevance of the training is more important than the frequency. Sharing insights and knowledge gained during training with other team members fosters a culture of collaboration and shared knowledge.

Ethics is an essential foundation of Oyster Care that permeates and underpins all other elements of care. Ethics always involves a balancing of values, and in Oyster Care there are a great many values at stake. For example, there is a constant tension between the value of autonomy on the one hand and the values of caregiving and protectiveness on the other. Caregivers can best weigh values in a trialogue with the care user and with the caregiver's loved ones. To do so, they can use models of ethical consultation or moral reflection in the workplace. The basic attitudes of caregivers, their motivation and inspiration, determine the quality of their care, their ethical considerations and moral reflection. Being open to others with consideration and mildness, and treating them with respect and commitment, are essential. To provide ethically sound care; and to continue to care for the individual; the team actively engages in supervision, peer review and moral deliberation. It is recommended that at least 12 hours per year be devoted to supervision, peer review and moral deliberation. These forms of support are offered proactively as well as used when ethical issues arise during the delivery of care. In this way, healthcare providers can continue to grow, learn and develop so that they can provide ethical care that meets the complex needs of the healthcare user

Evaluating the quality of care is necessary to continuously improve the quality of care. Therefore, the team is strongly encouraged to regularly evaluate their care practices. This process includes questioning current practices, identifying areas for improvement and creating an action plan to implement these improvements, often in the form of the PDCA (Plan-Do-Check-ACT) cycle. Annual reviews of quality of care, based on measurable quality indicators, can contribute to a structured evaluation process. It is important that not only caregivers, but also care users and their relatives are involved in this evaluation process; in this way, the team gets an overall picture of the quality of care and targeted improvements can be made that actually meet the needs and expectations of care users.

| **Theme 22. Professionalization, innovation and quality of care** | | | | |
| --- | --- | --- | --- | --- |
| Not visible | In development | Embedded | Pearl | Comments |
| - New team members receive active support to make Oyster Care their own - The team undergoes regular training and education, learning from experts and translating these insights into their own practice - The team uses its professional freedom to work creatively and out-of-the-box within the supervision of a care user and shows innovation in devising initiatives to provide quality Oyster Care - The team regularly organizes supervision, peer review or moral reflection - The team regularly evaluates the quality of care and the results are used to improve care | | | | |

1. **Leadership**

**Workbook:** To structurally implement Oyster Care, good leadership is key and this entails a number of defining characteristics and responsibilities. First, they develop policies that meet the needs of people with SPMI; they do this by working with the team, care users and significant others to establish policy guidelines and review them regularly to ensure continuous improvement. To develop policies in this way, a good leader stays involved in the daily work of the team. This includes understanding the work of caregivers, being aware of the challenges they face and showing appreciation for their efforts. This helps facilitate a positive work environment and motivation of the team. Effective leaders know the talents of their team members and encourage them to use these talents in the work. This allows individual capacities and growth potential to be maximized. The creation and annual discussion of a personal development plan can guide this process. Leaders also play a key role in creating the preconditions necessary for the success of Oyster Care. This includes acquiring financial resources, for example to offer therapies and activities on a trial basis, minimizing administrative burdens and ensuring sufficient and competent staff. Further, they communicate a clear vision from within the organization, getting staff excited about the vision, as well as enthusing management, board and external stakeholders to build support for the care model and facilitate collaboration in the care of this target population. There is also facilitating flexibility with rules, especially in a hospital setting, as rigid rules can sometimes hinder good Oyster Care. Leaders must then be able to suggest and implement appropriate adjustments.

| **Theme 23. Leadership** | | | | |
| --- | --- | --- | --- | --- |
| Not visible | In development | Embedded | Pearl | Comments |
| - The leading team demonstrates themselves ambassadors of the Oyster Care model and makes demonstrable efforts to achieve high quality Oyster Care | | | | |

## Domain 8. The place of residence

*The eighth domain “the place of residence” focuses on creating a suitable living and housing environment and designing an infrastructure tailored to the needs of care users, their relatives and the healthcare team.* *The residence has one theme, namely the living and housing environment*

**Model description**

Paying attention to the residential and living environment and providing the right infrastructure contributes to the well-being of care users. In Oyster Care, the team creates a safe and structured environment or “exoskeleton” where encounters can take place and are encouraged, and where the “strange” is respected and tolerated as long as the situation remains safe4,14. The environment is organized so that care users can feel at home, can socialize and express themselves safely. A homely and welcoming atmosphere is valuable not only for care users, but also for loved ones and the caregivers themselves3,12,15. Because Oyster Care focuses on providing tailored care, and both connection and tranquility are central, there may be added value in being able to adapt the environment so that working in small groups is possible. Having a single room or being able to stay in small housing units, and preferably a place where care users feel at home in the local community, can also contribute to this3,11,15.

1. **The home and living environment**

**Workbook**: Creating a home-like atmosphere goes beyond simply putting the physical environment in order. It is about encouraging a sense of belonging, personal growth and involvement in the wider community; it contributes to the well-being and quality of life of the care user; it is a place where everyone can feel safe. A home-like atmosphere is promoted by regularly redesigning the living environment together with care users. For example, by adapting the environment to the seasons, holidays and even current social themes, such as the World Cup in Football; or photos of past activities and exhibiting works of art created by care users. These modifications help create a personal atmosphere, can enhance care users' sense of self-worth and identity, and allow care users to feel more connected to reality and the world around them. The use of elements from nature, such as choice of materials, color palettes, the presence of animals and a vegetable garden or fruit trees, have a calming and soothing effect and provide a connection to nature, even in a hospital context. It is important that not only care users but also their loved ones feel welcome and at ease. For example, by setting up a cozy space where visits can take place.

Furnishing the living environment with attention to both tranquility and connection is of great importance, but can also be complex given the diversity of the target group. Living together can lead to dynamic interactions, such as bartering and sometimes even taking advantage of each other, but it can also lead to over-stimulation, due to the presence of different personalities and sometimes disruptive behavior. In such situations, there is the need for space to retreat. On the other hand, the presence of others can provide a sense of security, social contact and a sense of community. Therefore, there is a need for different spaces and corners where care users can isolate themselves when necessary; and also to be able to practice their habits without bothering others and/or causing a inconvenience. For example, the presence of different spaces, such as quiet rooms, a music room or quiet spots in the garden. The availability of multiple spaces is good not only for care users, but also for caregivers. Organizing activities or providing therapy in a large group can sometimes be overwhelming. Having multiple rooms makes it easier to provide customized care, therapy and activities.

A single room is not only a place to stay, but also an expression of privacy, personal expression and comfort. It allows care users to retreat for a while, shape their personal space and participate in community life at their own pace. Some care users may find it difficult to leave the safety of their room and participate in social activities. This is when it is especially important that the room is equipped with the facilities needed to lead a quality life. An important aspect of making the room their own is that care users can decorate the room to their own taste. For example, by putting decorations on the walls, giving the walls a color they like and hanging pictures of important people in their lives. In this way, they can personalize their room and create a sense of home and individuality. The room is considered a very personal space where care users can retreat. The use of a room key is an expression of this respect for personal space. In ideal circumstances, Oyster Care is provided in small living units, where care users can live as independently as possible, surrounded by a quiet living atmosphere and personal space.

Typically, people in a Oyster Care setting are given the opportunity to stay as long as needed, often as long as care users need the “shell” or the time needed to form a “shell” that can be taken to another living environment. It is important that the team informs the care user and their context about when support in a Oyster Care Setting will be transferred to another setting. The transition to a new residential setting is carefully prepared, in close consultation with the care user and their loved ones. The team identifies the expectations of the care user and loved ones about future living environment; searches for a suitable place to stay; and guides the care user in getting to know the new environment and developing skills to thrive in the new environment, gradually releasing the “shell. As part of care continuity, the care user, and possibly the new care partners, are contacted regularly after the move to ensure that the care partners understand the 'shell' and a connection is made with the care user so that the person can integrate well into their new environment.

Adapting infrastructure to meet the needs of care users, loved ones and caregivers can reduce stress and promote well-being. The process of adapting infrastructure begins with regular reviews (particularly when remodeling plans or obtaining new resources) by the team, in collaboration with care users, to understand how the environment can be improved to meet the needs of all involved to enhance the care experience. Infrastructure, for example, can be adapted to age groups. In care for the elderly, customized furniture can be installed that takes into account their age and mobility. Specific relaxation areas can be designed for young people. In addition, certain spaces can be designed to meet the needs of care users with sensory hypersensitivity, such as creating comfortably furnished (outdoor) areas with low stimuli. Snoozle rooms and spaces for wellness activities can also be valuable. Natural light, views of nature and the creation of a pleasant garden contribute to a calming environment. It is also important to separate spaces to prevent stimuli from one care user causing unintended reactions in others.

| **Theme 24. The home and living environment** | | | | |
| --- | --- | --- | --- | --- |
| Not visible | In development | Embedded | Pearl | Comments |
| - The living environment reflects a homely atmosphere - a warm home where everyone can feel safe and secure - and is regularly redecorated - The living environment is designed so that care users experience both tranquility and connection - The care user can stay in a single room and is supported in making the room his/her own - A change of living environment is carefully prepared in consultation with the care user and his/her relatives, and also after the relocation contact is maintained in the context of continuity of care - The team regularly evaluates, together with the care users, how the infrastructure can be improved to meet the needs of the care users, relatives and the team members themselves | | | | |

# Recommendations for further research and policy

In the effort to provide quality care for people with severe and persistent psychiatric disorders, this volume describes the conceptual model and operational characteristics of Oyster Care and formulates quality indicators. These efforts represent an important step in the visibility and improvement of care for people with SPMI. However, we must recognize that this is only an intermediate step toward optimal care for this target population. In this regard, there are some valuable recommendations for further research and policy that can ensure that we can take care of people with SPMI to the next level to meet the complex needs of these people.

A follow-up study should further assess the validity of the quality indicators. This can be done through a feasibility study to determine if the quality monitor is practical for end users in a Oyster Care setting or if further refinement is needed. In addition, the Oyster Care Model should be subjected to a process and effectiveness evaluation. Such a study assesses the extent to which Oyster Care is implemented effectively, through the monitor, and contributes to important end outcomes for people with SPMI, such as quality of life.

This set of quality indicators can be used by Oyster Care units of both psychiatric hospitals and psychiatric nursing homes in Flanders to evaluate and possibly improve the quality of care. In the future, these quality indicators can also be translated to other contexts, such as residential care centers and mobile, ambulatory teams, so that these teams can also use the indicators. Sometimes it can also be valuable to adapt indicators to the specific context in which the quality indicators are used. It is then important to track what adjustments have been made to measure their impact on outcomes6.

This study examined what an optimally constituted Oyster care team should look like. The findings show that there is no single answer to this question. This lack of uniformity in answers can possibly be explained by the different needs and circumstances in different care contexts, such as psychiatric hospitals and psychiatric nursing homes. However, the results do show that sufficient staff is needed to meet the constantly changing needs of care users. For example, to smoothly increase care intensity and provide one-on-one care. Moreover, the presence of a diverse team of activity supervisors and therapists with different professional backgrounds is highlighted. This team consists of professionals such as a music therapist, creative therapist, occupational therapist, psychomotor therapist, hippotherapy therapist, drama therapist and dance therapist, who collectively work to provide a holistic approach to care and allow each care user to participate and connect with specific therapies and/or activities. It was also stressed that sufficient presence of a psychiatrist and psychologist is important, as these professionals play an essential role in understanding and supporting care users in learning to manage their symptoms. It also highlights the need for collaboration with general practitioners, as well as sufficient hours for social workers and existential care providers to meet the somatic, social and existential needs of care users. The research also points to the added value of having an expert by experience. Future research should focus on formulating concrete guidelines for the optimal team structure of a Oyster Care Unit so that policymakers can adequately allocate resources and ensure high-quality care.

A central policy recommendation to boards and policymakers is to invest space and time in implementing the Oyster Care Model using the monitor. It is essential that caregivers can work according to the indicators that describe quality Oyster Care. For this, the right infrastructure must be available, the team must be flexible with rules, sufficient competent staff must be employed, and so on. In addition, caregivers must receive the necessary training and education to use the Oyster Care Monitor correctly.

# References

1. Braun, V., & Clarke, V. (2006). Using thematic analysis in psychology. *Qualitative Research in Psychology*, 3, 77-101. https://doi.org/10.1191/1478088706qp063oa
2. Butler, H., & O’Brien, A. J. (2018). Access to specialist palliative care services by people with severe and persistent mental illness: A retrospective cohort study. *International Journal of Mental Health Nursing, 27*, 737-746. <https://doi.org/10.1111/inm.12360>
3. Decorte, I., Verfaillie, F., Moureau, L., Meynendonckx, S., Van Ballaer, K., De Geest, I., & Liégois, A. (2020). Oyster Care: An Innovative Palliative Approach towards SPMI Patients. *Frontiers in Psychiatry, 11*, 509. <https://doi.org/10.3389/fpsyt.2020.00509>
4. Decorte, I., Verfaillie, F., Moureau, L., Van Ballaer, K., De Geest, I., & Liégois, A. (2021). Schelpzorg: een palliatief zorgmodel voor patiënten met een ernstige, persisterende psychiatrische aandoening. *Tijdschrift voor Geneeskunde, 2*, 133-140. Doi: [10.47671/TVG.77.20.177](http://dx.doi.org/10.47671/TVG.77.20.177)
5. Donald, E. E. & Stajduhar, K. I. (2019). A scoping review of palliative care for persons with severe persistent mental illness. *Palliative & supportive care, 17*, 479-487. <https://doi.org/10.1017/S1478951519000087>
6. Durlak, J. A., & DuPre, E. P. (2008). Implementation matters: A review of research on the influence of implementation on program outcomes and the factors affecting implementation. *American journal of community psychology, 41*, 372-350). https://doi.org/10.1007/s10464-008-9165-0
7. Elie, D., Marino, A., Torres-Platas, S. G., Nohi, S., Semeniuk, T., Segal, M., Looper, K. J., & Rej, S. (2018). End-of-Life Care Preferences in Patients with Severe and Persistent Mental Illness and Chronic Medical Conditions: A Comparative Cross-Sectional Study. *The American Journal of Geriatric Psychiatry, 26*, 89-97. https://doi.org/10.1016/j.jagp.2017.09.018
8. Gloeckler, S. & Trachsel, M. (2021). Nurses’ views on palliative care for those diagnosed with severe persistent mental illness: A Pilot Survey Study in Switzerland. *Journal of psychiatric and mental health nursing,* Online ahead of print.<https://doi.org/10.1111/jpm.12742>
9. Hanan, D. M., & Lyons, K. S. (2021). Hospice Use Among Individuals With Severe and Persistent Mental Illness. *Journal of the American Psychiatric Nurses Association, 27*, 213-221. https://doi.org/10.1177/1078390320910482
10. Hodel, M. (2019). The Role of Palliative Care in Severe and Persistent Mental Illness. Dissertation, University of Zurich, Faculty of Medicine. https://doi.org/10.5167/uzh-176333
11. Killaspy, H., King, M., Wright, C., White, S., McCrone, P., Kallert, T., Cervilla, J., Raboch, J., Onchev, G., Mezzina, R., Wiersma, D., Kiejna, A., Ploumpidi, D., & Caldas de Almeida, J. M. (2009). Study protocol for the development of a European measure of best practice for people with long term mental health problems in institutional care (DEMoBinc). *BMC Psychiatry, 9*, 36. https://doi.org/10.1186/1471-244X-9-36
12. Levitt, S., & Buchman, D. Z. (2020). Applying futility in psychiatry: a concept whose time has come. *Journal of Medical Ethics*. <http://dx.doi.org/10.1136/medethics-2020-106654>
13. Lindblad, A., Helgesson, G., & Sjöstrand, M. (2019). Towards a palliative care approach in psychiatry: do we need a new definition? *Journal of medical ethics, 45*, 26-30. <http://dx.doi.org/10.1136/medethics-2018-104944>
14. Marijnissen, R., Chambaere, K., & Oude Voshaar, R. (2022). *Handboek psychiatrie in de laatste levensfase* (hoofdstuk: Crustatieve Zorg).Uitgeverij Boom
15. Moonen, C., Lemiengre, J., & Gastmans, C. (2016). Dealing With Existential Suffering of Patients With Severe Persistent Mental Illness: Experiences of Psychiatric Nurses in Flanders (Belgium). *Archives of Psychiatric Nursing, 30*, 219-225. https://doi.org/10.1016/j.apnu.2015.10.005
16. Moureau, L., Verhofstadt, M., & Liégeois, A. (2023). Mapping the ethical aspects in end-of-life care for persons with a severe and persistent mental illness: A scoping review of the literature. *Frontiers in Psychiatry, 14*, 1094038. https://doi.org/10.3389/fpsyt.2023.1094038
17. Stoll, J., Hodel, M. A., Riese, F., Irwin, S. A., Hoff, P., Biller-Andorno, N., & Trachsel, M. (2021). Compulsory Interventions in Severe and Persistent Mental Illness: A Survey on Attitudes Among Psychiatrists in Switzerland. *Frontiers in Psychiatry, 12*, 537379*.* https://doi.org/10.3389/fpsyt.2021.537379
18. Strand, M., Sjöstrand, M., & Lindblad, A. (2020). A palliative care approach in psychiatry: clinical implications. *BMC Psychiatry, 21*, 29. https://doi.org/10.1186/s12910-020-00472-8
19. Trachsel, M., Hodel, M. A., Irwin, S. A., Hoff, P., Biller-Andorno, N., & Riese, F. (2019). Acceptability of palliative care approaches for patients with severe and persistent mental illness: a survey of psychiatrists in Switzerland. *BMC Psychiatry, 19*, 111. https://doi.org/10.1186/s12888-019-2091-x
20. Trachsel, M., Irwin, S. A., Biller-Andorno, N., Hoff, P., & Riese, F. (2016). Palliative psychiatry for severe persistent mental illness as a new approach to psychiatry? Definition, scope, benefits, and risks. *BMC Psychiatry, 16*, 260. https://doi.org/10.1186/s12888-016-0970-y
21. Westen, K., van Vugt, M., Bähler, M., Delespaul, P., & Kroon, H. (2019). De ontwikkeling van de vernieuwde Flexibele ACT-schaal: F-ACT-s 2017. *Tijdschrift voor psychiatrie, 61*, 97-103.
22. Woods, A., Willison, K., Kington, C., & Gavin, A. (2008). Palliative Care for People with Severe Persistent Mental Illness: A Review of the Literature. *The Canadian Journal of Psychiatry, 53*, 725-736. https://doi.org/10.1177/070674370805301104
23. Zomer, L. J. C., Voskes, Y., van Weeghel, J., Widdershoven, G. A. M., van Mierlo, T. F. M. M., Berkvens, B. S., Stavenuiter, B. & van der Meer, L. (2020). The Active Recovery Triad Model: A New Approach in Dutch Long-Term Mental Health Care. *Frontiers in Psychiatry, 11*, 592228. <https://doi.org/10.1177/070674370805301104>
24. Zumstein, N. & Riese, F. (2020). Defining Severe and Persistent Mental Illness – A Pragmatic Utility Concept Analysis. *Frontiers in Psychiatry, 11*, 648. <https://doi.org/10.3389/fpsyt.2020.00648>

# Acknowledgements

It is with great gratitude that we wish to address the floor to all those who, each in their own way, have made a valuable contribution to this project.

First, we would like to express our sincere thanks to everyone who contributed to a specific phase of this research. Both those working in the field and policy and people with SPMI and their loved ones. Your valuable insights, willingness to share experiences and candid conversations have led to a deep understanding of what Oyster Care is and should be. We would also like to express our thanks to the various organizations that opened their doors and warmly welcomed us to engage in conversation about caring for people with SPMI.

A special mention deserves Manon Strumane, Lena Beirnaert and Juliette Van Ryssel. Your dedication and continued involvement during the process of data collection and analysis allowed us to engage a significant number of people for this project. We would like to thank our Dutch partners for their inspiration, valuable contributions and critical eye that enriched our project.

A special recognition goes to Dr. Ilse Decorte and Dr. Françoise Verfaillie, who are dedicating their careers to better positioning and quality care for the most vulnerable people within mental health care.

Finally, we would like to express our sincere thanks to the Congregation of the Sisters of 'Mercy Jesu' for their financial support and their warm commitment to this target group. We would also like to thank Palliative Care Flanders for their involvement in supporting this project.

We are optimistic that this set of quality indicators will contribute to setting the standards of high-quality care for people with severe and persistent psychiatric disorders, and we enthusiastically look forward to the further development of Oyster Care. If you would like to contribute thoughts on the further development of Oyster Care and the rollout of the set of quality indicators, share ideas, or see other opportunities for collaboration, we would love to hear from you.

On behalf of the research group

Anonymized

www.crustatievezorg.be

info.schelpzorg@gmail.com
